# Supplementary material for: Pathways linking socioeconomic status to small-for-gestational-age (SGA) infants among primiparae: a birth cohort study in China
Source: PubMed Central journal article supplement — BMJ Open. 2018 Jun 14;8(6):e020694. doi: 10.1136/bmjopen-2017-020694 (PMC6009518; doi:10.1136/bmjopen-2017-020694), 2018-06-14
Supplement: bmjopen-2017-020694.draft_revisions.pdf [file bmjopen-2017-020694.draft_revisions.pdf]

# BMJ Open

BMJ Open is committed to open peer review. As part of this commitment we make the peer review history of every article we publish publicly available.

When an article is published we post the peer reviewers' comments and the authors' responses online. We also post the versions of the paper that were used during peer review. These are the versions that the peer review comments apply to.

The versions of the paper that follow are the versions that were submitted during the peer review process. They are not the versions of record or the final published versions. They should not be cited or distributed as the published version of this manuscript.

BMJ Open is an open access journal and the full, final, typeset and author-corrected version of record of the manuscript is available on our site with no access controls, subscription charges or pay-per-view fees (<http://bmjopen.bmj.com>).

If you have any questions on BMJ Open's open peer review process please email [info.bmjopen@bmj.com](mailto:info.bmjopen@bmj.com)

# BMJ Open

## Pathways Linking Socio-economic Status to Small-for-Gestational Age (SGA) Infants among Primiparae: A Birth Cohort Study

|                               |                                                                                                                                                                                                                                                                                                                                                                                                                                                                                                                                                                                                                                                                                                                                                                                                                                                                                                                                                                                                                                                                                                                                                                                                                                                                                                                                                                                                                                                                                                                                                                                                                                                                                                                                                                                                                                                                                                                                                                                                                                                                                                                                                                                                                                                                                                                                                                |
|-------------------------------|----------------------------------------------------------------------------------------------------------------------------------------------------------------------------------------------------------------------------------------------------------------------------------------------------------------------------------------------------------------------------------------------------------------------------------------------------------------------------------------------------------------------------------------------------------------------------------------------------------------------------------------------------------------------------------------------------------------------------------------------------------------------------------------------------------------------------------------------------------------------------------------------------------------------------------------------------------------------------------------------------------------------------------------------------------------------------------------------------------------------------------------------------------------------------------------------------------------------------------------------------------------------------------------------------------------------------------------------------------------------------------------------------------------------------------------------------------------------------------------------------------------------------------------------------------------------------------------------------------------------------------------------------------------------------------------------------------------------------------------------------------------------------------------------------------------------------------------------------------------------------------------------------------------------------------------------------------------------------------------------------------------------------------------------------------------------------------------------------------------------------------------------------------------------------------------------------------------------------------------------------------------------------------------------------------------------------------------------------------------|
| Journal:                      | <i>BMJ Open</i>                                                                                                                                                                                                                                                                                                                                                                                                                                                                                                                                                                                                                                                                                                                                                                                                                                                                                                                                                                                                                                                                                                                                                                                                                                                                                                                                                                                                                                                                                                                                                                                                                                                                                                                                                                                                                                                                                                                                                                                                                                                                                                                                                                                                                                                                                                                                                |
| Manuscript ID                 | bmjopen-2017-020694                                                                                                                                                                                                                                                                                                                                                                                                                                                                                                                                                                                                                                                                                                                                                                                                                                                                                                                                                                                                                                                                                                                                                                                                                                                                                                                                                                                                                                                                                                                                                                                                                                                                                                                                                                                                                                                                                                                                                                                                                                                                                                                                                                                                                                                                                                                                            |
| Article Type:                 | Research                                                                                                                                                                                                                                                                                                                                                                                                                                                                                                                                                                                                                                                                                                                                                                                                                                                                                                                                                                                                                                                                                                                                                                                                                                                                                                                                                                                                                                                                                                                                                                                                                                                                                                                                                                                                                                                                                                                                                                                                                                                                                                                                                                                                                                                                                                                                                       |
| Date Submitted by the Author: | 17-Nov-2017                                                                                                                                                                                                                                                                                                                                                                                                                                                                                                                                                                                                                                                                                                                                                                                                                                                                                                                                                                                                                                                                                                                                                                                                                                                                                                                                                                                                                                                                                                                                                                                                                                                                                                                                                                                                                                                                                                                                                                                                                                                                                                                                                                                                                                                                                                                                                    |
| Complete List of Authors:     | <p>Luo, Xiu; Tongji Medical College, Huazhong University of Science and Technology, Department of Maternal and Child Health and MOE (Ministry of Education) Key Laboratory of Environment and Health, School of Public Health</p> <p>Liu, Lingfei; Tongji Medical College, Huazhong University of Science and Technology, Department of Maternal and Child Health and MOE (Ministry of Education) Key Laboratory of Environment and Health, School of Public Health</p> <p>Gu, Huaiting; Tongji Medical College, Huazhong University of Science and Technology, Department of Maternal and Child Health and MOE (Ministry of Education) Key Laboratory of Environment and Health, School of Public Health</p> <p>Hou, Fang; Tongji Medical College, Huazhong University of Science and Technology, Department of Maternal and Child Health and MOE (Ministry of Education) Key Laboratory of Environment and Health, School of Public Health</p> <p>Xie, Xinyan; Huazhong University of Science and Technology Tongji Medical College, Department of Maternal and Child Health and MOE (Ministry of Education) Key Laboratory of Environment and Health, School of Public Health</p> <p>Li, Xin; Tongji Medical College, Huazhong University of Science and Technology, Department of Maternal and Child Health and MOE (Ministry of Education) Key Laboratory of Environment and Health, School of Public Health</p> <p>Meng, Heng; Tongji Medical College, Huazhong University of Science and Technology, Department of Maternal and Child Health and MOE (Ministry of Education) Key Laboratory of Environment and Health, School of Public Health</p> <p>Zhang, Jiajia; South Carolina College of Pharmacy - University of South Carolina Campus, Department of Epidemiology and Biostatistics, Arnold School of Public Health</p> <p>Xu, Shunqing; Tongji Medical College, Huazhong University of Science and Technology, Key Laboratory of Environment and Health, Ministry of Education &amp; Ministry of Environmental Protection, and State Key Laboratory of Environmental Health, School of Public Health</p> <p>Song, Ranran; Tongji Medical College, Huazhong University of Science and Technology, Department of Maternal and Child Health and MOE (Ministry of Education) Key Laboratory of Environment and Health, School of Public Health</p> |

1  
2  
3  
4  
5  
6  
7  
8  
9  
10  
11  
12  
13  
14  
15  
16  
17  
18  
19  
20  
21  
22  
23  
24  
25  
26  
27  
28  
29  
30  
31  
32  
33  
34  
35  
36  
37  
38  
39  
40  
41  
42  
43  
44  
45  
46  
47  
48  
49  
50  
51  
52  
53  
54  
55  
56  
57  
58  
59  
60

|           |                                                                          |
|-----------|--------------------------------------------------------------------------|
| Keywords: | Hypertension < CARDIOLOGY, EPIDEMIOLOGY, SOCIAL MEDICINE, SLEEP MEDICINE |
|           |                                                                          |

SCHOLARONE™  
Manuscripts

For peer review only

1 **Pathways Linking Socio-economic Status to Small-for-Gestational Age (SGA)**

2 **Infants among Primiparae: A Birth Cohort Study**

3 Xiu Luo <sup>a</sup>, Lingfei Liu <sup>a</sup>, Huaiting Gu <sup>a</sup>, Fang Hou <sup>a</sup>, Xinyan Xie <sup>a</sup>, Xin Li <sup>a</sup>, Heng  
4 Meng <sup>a</sup>, Jiajia Zhang <sup>b</sup>, Shunqing Xu <sup>c</sup>, Ranran Song <sup>a\*</sup>

5 <sup>a</sup> Department of Maternal and Child Health and MOE (Ministry of Education) Key  
6 Laboratory of Environment and Health, School of Public Health, Tongji Medical  
7 College, Huazhong University of Science and Technology, Wuhan, China, 430030.

8 <sup>b</sup> Department of Epidemiology and Biostatistics, Arnold School of Public Health,  
9 University of South Carolina, Columbia, USA, 29208

10 <sup>c</sup> Key Laboratory of Environment and Health, Ministry of Education & Ministry of  
11 Environmental Protection, and State Key Laboratory of Environmental Health, School  
12 of Public Health, Tongji Medical College, Huazhong University of Science and  
13 Technology, Wuhan, China.

14  
15 \* Corresponding author: TEL: 86-27-836-57509;

16 E-mail address: [songranran@hust.edu.cn](mailto:songranran@hust.edu.cn)

17 Word count, 3100

18

19 **ABSTRACT**

20 **Objectives** Evidence about the relationship between socio-economic status (SES) and  
21 small-for-gestational age (SGA) infants was insufficient among Chinese primiparae.  
22 In addition, factors that may mediate this relationship are poorly understood. The  
23 purpose of this study was to investigate the risk of and mediators between SES and  
24 SGA.

25 **Design** Retrospective cohort study.

26 **Setting** Wuhan, Hubei, China.

27 **Method** Participants were recruited from patients who gave birth in the maternity care  
28 hospital of Wuhan between September 2012 and October 2014. Logistic regression  
29 models were used to estimate odds ratios (ORs) and 95% confidence intervals (CIs)  
30 for SGA in relation to SES. Pathway analysis was performed to examine the  
31 contribution of maternal lifestyles and pregnancy-induced hypertension syndrome  
32 (PIH) to the relationship between SES and SGA. Total effect, direct effect and indirect  
33 effect of SES on SGA were measured. Effect sizes were evaluated by unstandardized  
34 estimates (B) and standardized estimates ( $\beta$ ).

35 **Results** Among 8737 primiparae, 927 (10.61%) pregnant women had babies with  
36 SGA. High SES was inversely associated with risk of SGA (OR, 0.770; 95% CI,  
37 0.669, 0.886). After adjustment for potential confounders, the OR for SGA was 0.856  
38 (95% CI, 0.737, 0.995). Maternal obstetric characteristics, lifestyles and PIH  
39 completely mediated SES and SGA (indirect effect: B=-0.067, 95% CI=-0.108,

1  
2  
3  
4 40 -0.026). The indirect effect of SES was strengthened by PIH (B=-0.029), a  
5  
6 41 multi-vitamin supplement (B=-0.021), pre-pregnancy body mass index (BMI)  $\geq 18.5$   
7  
8 42 (B=-0.009) and pre-pregnancy BMI  $\geq 18.5$  to gestational weight gain (GWG) not  
9  
10  
11 43 below Institute of Medicine (IOM) (B=-0.003).

12  
13 44 **Conclusions** Our research suggested that high SES was a positive protector against  
14  
15 45 SGA. Avoiding PIH, taking a multi-vitamin supplement during early pregnancy,  
16  
17 46 keeping normal pre-pregnancy BMI and gaining reasonable gestation weight may  
18  
19 47 represent important protectors for SGA infants among pregnant women from low  
20  
21 48 SES.

22  
23  
24  
25 49 **Keywords** socio-economic status (SES), SGA, primiparae, mediators, pathway  
26  
27  
28 50 analysis

29  
30  
31 51 **Strengths and limitations of this study**

32  
33  
34  
35 52 Face-to-face interviews, medical records and medical measurements provided rich  
36  
37 53 covariate data, which allowed us to adjust for potential confounders for SGA.  
38  
39 54 SES index was combined with parental education and occupation. This index was  
40  
41 55 more robust when it was compared to education and occupation separately in China.  
42  
43 56 This is the first study evaluating maternal lifestyles and PIH, which mediate  
44  
45 57 socio-economic status (SES) and SGA among primiparae in China.  
46  
47 58 Some of our variables, such as a micronutrient supplement, physical activity and sleep  
48  
49 59 quality during pregnancy relied on self-report, which are subjective.

1  
2  
3  
4 60 **Abbreviations**  
5  
6  
7

8 61 **BMI** Body mass index  
9

10 62 **GWG** Gestational weight gain  
11

12 63 **IOM** Institute of Medicine  
13

14 64 **SES** Socio-economic status  
15

16 65 **SGA** Small-for-gestational age  
17

18 66 **AGA** Appropriate-for-gestational age  
19

20 67 **CI** Confidence interval  
21

22 68 **OR** Odds ratio  
23

24 69 **PIH** Pregnancy-induced hypertension syndrome  
25  
26  
27  
28  
29  
30

31 70 **INTRODUCTION**  
32  
33  
34

35 71 Small-for-gestational age (SGA) infants is defined as birthweight below the tenth  
36  
37 72 percentile of a standard optimal reference population for a given gestational age and  
38  
39 73 sex.<sup>1</sup> SGA infants are at increased risk of perinatal morbidity and mortality<sup>2</sup> as well as  
40  
41 74 long-term adverse health<sup>3</sup> and developmental outcomes.<sup>4</sup> In 2010, the overall  
42  
43 75 prevalence of SGA infants was 27% of live births in 138 low- and middle-income  
44  
45 76 countries.<sup>5</sup> Another pooled country analysis research identified that the relative risks  
46  
47 77 for babies who were SGA were 1.83 for neonatal mortality and 1.90 for post-neonatal  
48  
49 78 mortality among 20 cohorts (providing data for 2,015,019 livebirths) from Asia,  
50  
51 79 Africa and Latin America.<sup>6</sup> Therefore, it is important to recognize the potential risk  
52  
53  
54  
55  
56  
57  
58  
59  
60

1  
2  
3  
4 80 factors for SGA infants during pregnancy so that preventive measures can be targeted  
5  
6 81 at risk subgroups of pregnant women. A review from France found major risk factors  
7  
8 82 identified were previous SGA birth, disease during pregnancy, body mass index  
9  
10 83 (BMI<18.5 kg/m<sup>2</sup>) and socio-economic disadvantage.<sup>7</sup> Socio-economic disparities in  
11  
12 84 SGA infants have been relatively intractable over the past decades. However, the  
13  
14 85 mechanisms by which socio-economic disadvantage leads to higher risk of SGA  
15  
16 86 remain unclear.

17  
18  
19  
20 87 Socio-economic status (SES) is a complex phenomenon predicted by a broad  
21  
22 88 spectrum of variables. It is often conceptualized as a combination of financial,  
23  
24 89 occupational and educational influences.<sup>8</sup> The level of SES can partly explain the risk  
25  
26 90 at birth outcome,<sup>9</sup> children's anthropometric status,<sup>10</sup> and neurodevelopment.<sup>11</sup> The  
27  
28 91 risk of SGA was higher in the lower SES groups compared to the highest SES group  
29  
30 92 in Finland,<sup>12</sup> Australia,<sup>13</sup> Japan<sup>9</sup> and others. These estimates were based mainly on  
31  
32 93 findings from developed countries, with little reliable evidence from China. Moreover,  
33  
34 94 in the Hong Kong population, researchers demonstrated parental education, housing,  
35  
36 95 income and occupation were not clearly linearly associated with SGA.<sup>14</sup> As the  
37  
38 96 economy of Hong Kong is more developed than that of China mainland, it makes  
39  
40 97 great sense to explore the association between SES and SGA infants in mainland  
41  
42 98 China.

43  
44  
45  
46  
47  
48  
49  
50 99 Wang found that among 10,372 people from 28 provinces of China, those from  
51  
52 100 high SES promoted their health via health-related lifestyles.<sup>15</sup> Another study reviewed  
53  
54 101 the evidence focusing on aetiological factors that could mediate the socio-economic  
55  
56



1  
2  
3  
4 102 disparities in intrauterine growth restriction. Factors included maternal anthropometry,  
5  
6 103 micronutrients, physical activity, cigarette smoking and psychosocial factors.<sup>16</sup>  
7  
8 104 However, this review used a bibliographic method to find these evidence and it was  
9  
10 105 hard to reveal mediators without the pathway analysis. Furthermore, the gap between  
11  
12 106 the most and least deprived groups did not narrow for birthweight outcomes over the  
13  
14 107 four decades.<sup>17</sup> In the current study, we examined the association between SES and  
15  
16 108 SGA infants and aimed to uncover one of the potential mechanisms that could show  
17  
18 109 how SES affects SGA infants among Chinese primiparae in the Health Baby Cohort  
19  
20 110 (HBC).

## 21 22 23 24 25 26 27 111 **METHODS**

### 28 29 30 112 **Study Population**

31  
32  
33  
34 113 All participants were selected from the prospective Health Baby Cohort (HBC) study  
35  
36 114 in China, which has been described elsewhere.<sup>18</sup> It is an ongoing prospective cohort  
37  
38 115 study, which aims to explore how environmental and genetic factors affect child  
39  
40 116 health and development. Participants who had had a stillborn infant were excluded.  
41  
42  
43 117 Briefly, the cohort enrolled 11,311 pregnant women who gave birth to a live singleton  
44  
45 118 infant in the Women and Children Medical and Health-care Centre of Wuhan between  
46  
47 119 September 2012 and October 2014. In our study, we selected 9622 primiparae and  
48  
49 120 then, we excluded another 885 participants because of missing values in at least one  
50  
51 121 variable of interest, such as parental education and a nutritional supplement. Therefore,  
52  
53  
54  
55  
56  
57  
58  
59  
60

1  
2  
3  
4 122 a total of 8737 primiparae were finally included in our study. All participating women  
5  
6 123 provided their written informed consent at the time of recruitment.  
7  
8

#### 9 124 **Diagnosis of SGA**

10  
11  
12 125 Birthweight and infant's gender were obtained from delivery records. Gestational age  
13  
14  
15 126 was calculated from the date of the last menstrual period or the clinical estimate of  
16  
17 127 gestational age based on the clinical case system. Labour and delivery outcomes were  
18  
19  
20 128 extracted from birth records. Nude birthweight was measured for each infant within  
21  
22 129 one hour after birth by trained nurses using standardized procedures. We defined  
23  
24 130 small-for-gestational age (SGA) as a birthweight lower than the 10th percentile of our  
25  
26 131 population for a specific completed gestational age by gender.<sup>6</sup> On the other hand, we  
27  
28 132 defined appropriate for gestational age (AGA) as a birthweight equal to or higher than  
29  
30 133 the 10th centile for gestational age.  
31  
32  
33

#### 34 134 **Assessment of Covariates**

35  
36  
37  
38 135 The trained nurses conducted standardized face-to-face interviews with the  
39  
40 136 participants after delivery. Participants were asked to complete a questionnaire that  
41  
42 137 collected information on maternal age, maternal and paternal education level (years of  
43  
44 138 education), occupations (eight major categories of Chinese occupation), the use of a  
45  
46 139 multi-vitamin supplement during the first trimester of pregnancy (yes or no), physical  
47  
48 140 activity during the last trimester of pregnancy (almost none, 1–2 days, 3–4 days, 5–6  
49  
50 141 days, 7 days) per week, and sleep quality in the month before the birth (bad or good).  
51  
52  
53  
54  
55  
56  
57  
58  
59  
60

1  
2  
3  
4 142 Information regarding pregnancy-induced hypertension syndrome (PIH) was extracted  
5  
6 143 from medical records excluding chronic hypertension. PIH was defined as “yes” or  
7  
8 144 “no”. We calculated pre-pregnancy body mass index (BMI) from the self-reported  
9  
10 145 pre-pregnancy weight in kg divided by height in m<sup>2</sup>. BMI was categorized into four  
11  
12 146 groups based on recommendations by the Working Group on Obesity in China of the  
13  
14 147 Chinese Ministry of Health: underweight (<18.5 kg/m<sup>2</sup>); normal weight (18.5–23.9  
15  
16 148 kg/m<sup>2</sup>); overweight (24–27.9 kg/m<sup>2</sup>); and obese (≥ 28 kg/m<sup>2</sup>). Gestational weight gain  
17  
18 149 (GWG) was calculated by subtracting the pre-pregnancy weight from the weight  
19  
20 150 measured within 3 days of the delivery day. GWG was also categorized as below,  
21  
22 151 within, or above the recommendations according to the Institute of Medicine (IOM).<sup>19</sup>  
23  
24 152 Specifically, GWG within the IOM recommendations was defined as 12.5–18 kg,  
25  
26 153 11.5–16 kg, 7–11.5 kg and 5–9 kg for underweight, normal weight, overweight, and  
27  
28 154 obese women, respectively. Finally, we changed pre-BMI and GWG by IOM as  
29  
30 155 dichotomous variable (pre-BMI<18.50 or ≥18.5; GWG below IOM or not below).  
31  
32  
33  
34  
35  
36  
37  
38

### 39 156 **Assessment of Socio-economic Status**

40  
41  
42 157 SES index was measured by a combination of the education and occupation categories.  
43  
44 158 The scores of education and occupation are listed in Supplementary Table 1 and  
45  
46 159 Supplementary Table 2. SES index was measured based on the formula,  $SES = ((0.7 * \text{maternal education}) + (0.4 * \text{maternal occupation}) + (0.7 * \text{paternal education}) + (0.4 * \text{paternal occupation}))/2$ . Finally, the SES index categorization demonstrates that below  
47  
48  
49 160  
50  
51 161  
52  
53 162 one third of the study population distribution had low SES and the remainder had high

1  
2  
3 163 SES.<sup>20</sup>  
4  
5  
6

7 164 **Statistical Analysis**  
8  
9

10 165 Firstly, data were described as mean  $\pm$  SD for continuous variables or as percentage  
11  
12 166 for categorical variables. Differences between SGA and AGA were compared using  
13  
14 167 the Student's t-test for continuous variables and chi-square test for categorical  
15  
16 168 variables. Pearson's correlation was carried out between study variables. Logistic  
17  
18 169 regression models were used to examine the associations between SES and SGA.  
19  
20 170 Secondly, we used the pathway analysis to explore the hypothesized underlying  
21  
22 171 relations between variables of interested. The model was evaluated using the  
23  
24 172 following goodness-of-fit: the comparative-fit index (CFI) $>0.95$ , the  
25  
26 173 root-mean-square error of approximation (RMSEA) $<0.05$ . Modification indices were  
27  
28 174 used to detect misspecifications in the model. Estimation was carried out by a robust  
29  
30 175 weighted least-squares estimator (WLSMV). Because most of our variables were  
31  
32 176 categorical variables, WLSMV was one of the best methods for analysing our data set.  
33  
34 177 Effect sizes of the predictors on the outcome variables were expressed as  
35  
36 178 unstandardized estimates (B) and standardized estimates ( $\beta$ ). The total effects of the  
37  
38 179 predictors on the outcomes were computed by adding the indirect and direct effects  
39  
40 180 together.<sup>21</sup> Decoding of each response for further analysis was present in Table 1. All  
41  
42 181 of the analyses were conducted with R 3.2.2. All *P* values reported were two-sided  
43  
44 182 and 0.05 was used as significance level.  
45  
46  
47  
48  
49  
50  
51  
52  
53  
54 183

Table 1. Description of variables in pathway analysis.

| Variables                                                          | Decoding of each response                                                                                          |
|--------------------------------------------------------------------|--------------------------------------------------------------------------------------------------------------------|
| SES                                                                | 0="low", 1="high"                                                                                                  |
| GWG by IOM                                                         | 0="below", 1="within and above"                                                                                    |
| Pre-BMI                                                            | 0="<18.5", 1="≥18.5"                                                                                               |
| Physical activity during the last trimester of pregnancy           | 0="almost none per week", 1="1-2 days per week", 2="3-4 days per week", 4="5-6 days per week", 5="7 days per week" |
| Sleep quality in the month before the birth                        | 0="bad", 1="good"                                                                                                  |
| A multi-vitamin supplement during the first trimester of pregnancy | 0="no", 1="yes"                                                                                                    |
| Infant's gender                                                    | 0="girl", 1="boy"                                                                                                  |
| Passive smoking during pregnancy                                   | 0="no", 1="yes"                                                                                                    |
| PIH                                                                | 0="no", 1="yes"                                                                                                    |
| Maternal age                                                       | continuous variable                                                                                                |
| SGA                                                                | 0="no", 1="yes"                                                                                                    |

SES, socio-economic status; BMI, body mass index; GWG, gestation weight gain; IOM, Institute of Medicine; SGA, small-for-gestational age; PIH, pregnancy-induced hypertension syndrome.

## 184 RESULTS

### 185 Study Population

186 A total of 8737 primiparae met our criterion and they finally included in our study.

187 The mean maternal age was  $27.70 \pm 3.24$  years. In total, 927 (10.61%) infants were

188 diagnosed with SGA. There were 4499 boys and 4238 girls with a boy-to-girl ratio of

189 1.06.

### 190 Characteristics of the Sample

191 The basic demographic characteristics among SGA are presented in Table 2. Mean

192 maternal age was younger, mean pre-pregnancy BMI was lower and gestational

1  
2  
3  
4 193 weight gain below IOM was more likely with women who had SGA infants.  
5  
6 194 Compared with women with AGA infants, women with SGA infants were more likely  
7  
8 195 to have PIH and came from low SES. Women with AGA infants tended to be more  
9  
10  
11 196 positive regarding taking a multi-vitamin supplement during the first trimester of  
12  
13 197 pregnancy. Correlations of the variables are presented in Supplementary Table 3.  
14  
15 198

For peer review only

Table 2. Characteristics of participants with SGA and AGA among primiparae in Wuhan, China (N=8737)

| Variables                                                          | N(%) or Mean $\pm$ SD | SGA                   | AGA                   | <i>P</i> |
|--------------------------------------------------------------------|-----------------------|-----------------------|-----------------------|----------|
|                                                                    |                       | N(%) or Mean $\pm$ SD | N(%) or Mean $\pm$ SD |          |
| GWG by IOM                                                         |                       |                       |                       |          |
| Below                                                              | 901(10.31)            | 208(22.44)            | 693(9.89)             | <0.001   |
| Within and above                                                   | 7836(89.69)           | 719(77.56)            | 7117(90.11)           |          |
| Pre-BMI                                                            |                       |                       |                       |          |
| <18.5                                                              | 2082(23.83)           | 309(33.33)            | 1773(21.74)           | <0.001   |
| $\geq$ 18.5                                                        | 6655(76.17)           | 618(66.67)            | 6037(78.26)           |          |
| Physical activity during the last trimester of pregnancy           |                       |                       |                       |          |
| almost none per week                                               | 834(9.55)             | 79(8.52)              | 755(8.65)             | 0.495    |
| 1-2 days per week                                                  | 831(9.51)             | 86(9.28)              | 745(8.98)             |          |
| 3-4 days per week                                                  | 663(7.59)             | 61(6.58)              | 602(7.83)             |          |
| 5-6 days per week                                                  | 146(1.67)             | 17(1.83)              | 129(1.86)             |          |
| every days per week                                                | 6263(71.68)           | 684(73.79)            | 5579(72.81)           |          |
| Sleep quality in the month before the birth                        |                       |                       |                       |          |
| Bad                                                                | 3063(35.06)           | 310(33.44)            | 2753(33.48)           | 0.275    |
| Good                                                               | 5674(64.94)           | 617(66.56)            | 5057(66.52)           |          |
| A multi-vitamin supplement during the first trimester of pregnancy |                       |                       |                       |          |
| No                                                                 | 3640(41.66)           | 434(46.82)            | 3206(36.51)           | 0.001    |
| Yes                                                                | 5097(58.34)           | 493(53.18)            | 4604(63.49)           |          |
| Infant's gender                                                    |                       |                       |                       |          |
| Boy                                                                | 4499(51.49)           | 467(50.38)            | 4032(51.86)           | 0.517    |
| Girl                                                               | 4238(48.51)           | 460(49.62)            | 3778(48.14)           |          |
| Passive smoking during pregnancy                                   |                       |                       |                       |          |
| No                                                                 | 7717(88.33)           | 813(87.7)             | 5206(89.7)            | 0.532    |
| Yes                                                                | 1020(11.67)           | 114(12.3)             | 598(10.3)             |          |
| Maternal age                                                       | 27.70 $\pm$ 3.24      | 27.32 $\pm$ 3.50      | 27.75 $\pm$ 3.21      | <0.001   |
| PIH                                                                |                       |                       |                       |          |
| No                                                                 | 8468(96.92)           | 882(95.15)            | 7586(97.13)           | 0.001    |
| Yes                                                                | 269(3.08)             | 45(4.85)              | 224(2.87)             |          |
| SES                                                                |                       |                       |                       |          |
| Low                                                                | 927(10.61)            | 361(38.94)            | 2572(9.82)            | <0.001   |
| High                                                               | 7810(89.39)           | 566(61.06)            | 5238(75.45)           |          |

SES, socio-economic status; BMI, body mass index; GWG, gestation weight gain; IOM, Institute of Medicine; SGA, small-for-gestational age; PIH, pregnancy-induced hypertension syndrome; AGA, appropriate-for-gestational age.

### 199 Associations between SES and SGA

200 To examine the association between SES and the risk of SGA, univariate and

201 multivariate logistic regression models were used in Table 3. Compared with women  
 202 with low SES, the OR of SGA was 0.770 (95% CI, 0.669, 0.886) for those with high  
 203 SES, in the unadjusted model. After adjustment for potential confounders, the ORs of  
 204 SGA were 0.846 (95% CI, 0.728, 0.983) and 0.856 (95% CI, 0.737, 0.995) in model 2  
 205 and model 3, respectively.

Table 3. Associations of SES with SGA among 8737 primiparae in Wuhan, China.

| SGA     | SES  | OR    | 95%CI        | <i>P</i> |
|---------|------|-------|--------------|----------|
| Model 1 | Low  | Ref   |              |          |
|         | High | 0.770 | 0.669, 0.886 | <0.001   |
| Model 2 | Low  | Ref   |              |          |
|         | High | 0.846 | 0.728,0.983  | 0.029    |
| Model 3 | Low  | Ref   |              |          |
|         | High | 0.856 | 0.737,0.995  | 0.043    |

ORs, odds ratios; SES, socio-economic status; SGA, small-for-gestational age; Model 1, unadjusted model; model 2 adjusted for maternal age, pre-BMI, gestational weight gain (GWG), a multi-vitamin supplement during the first trimester of pregnancy, sleep quality in the month before the birth, physical activity during last trimester and passive smoking during pregnancy; model 3 adjusted as model 2 plus PIH.

### 206 **Mediation Model for SGA**

207 We proposed a hypothetical model for SGA in Figure 1, including the mediators PIH,  
 208 a multi-vitamin supplement during first-trimester, pre-BMI, GWG by IOM, physical  
 209 activity during the last trimester of pregnancy and sleep quality in the month before  
 210 the birth. Covariates were maternal age and passive smoking during pregnancy.

211 Table 4 listed SGA with the best CFI and RMSEA, which were 0.012 and 0.967.  
 212 This model revealed that maternal obstetric characteristics, lifestyles and PIH  
 213 completely mediated SES and SGA. The indirect effect of SES was strengthened in  
 214 SGA (B=-0.067, 95% CI=-0.108, -0.026) via PIH (B=-0.029, *P*=0.021), a



1  
2  
3  
4 215 multi-vitamin supplement ( $B=-0.021$ ,  $P=0.010$ ), pre-pregnancy BMI $\geq$ 18.5 ( $B=-0.009$ ,  
5  
6 216  $P=0.010$ ) and pre-pregnancy BMI $\geq$ 18.5 to GWG not below IOM ( $B=-0.003$ ,  
7  
8 217  $P=0.007$ ).

9  
10  
11 218 In our model, the indirect effect came from the coefficient “a” multiplying by  
12  
13 219 coefficient “b”. For example, woman with high SES had more chance of taking a  
14  
15 220 multi-vitamin supplement ( $B=0.317$ ,  $P<0.001$ ). Then, a multi-vitamin supplement  
16  
17 221 taking decreased the SGA ( $B=-0.066$ ,  $P<0.05$ ). Thus, the indirect effect of SES to  
18  
19 222 SGA was  $0.317 \times -0.066 = -0.021$  through taking a multi-vitamin supplement.  
20  
21  
22  
23  
24  
25  
26  
27  
28  
29  
30  
31  
32  
33  
34  
35  
36  
37  
38  
39  
40  
41  
42  
43  
44  
45  
46  
47  
48  
49  
50  
51  
52  
53  
54  
55  
56  
57  
58  
59  
60

Table 4. Indirect and total effects of socio-economic status and maternal characteristics and lifestyles during pregnancy on SGA.

| Pathway                                                                 | SES→                   | Mediators→     | B      | SE    | 95%CI            | P value | β      |
|-------------------------------------------------------------------------|------------------------|----------------|--------|-------|------------------|---------|--------|
|                                                                         | Mediators              | Birth outcomes |        |       |                  |         |        |
|                                                                         | a                      | b              | a*b    |       |                  |         |        |
| <b>Small-for-gestational age (SGA)</b>                                  |                        |                |        |       |                  |         |        |
| Total effect                                                            |                        |                | -0.067 |       |                  |         | -0.030 |
| Direct effect (c)                                                       |                        |                | -0.046 | 0.044 | (-0.132, 0.040)  | 0.299   | -0.034 |
| Indirect effect                                                         |                        |                | -0.067 | 0.021 | (-0.108, -0.026) | 0.001   | -0.030 |
| SES→ Pre-BMI≥18.50→GWG not below IOM                                    | 0.033*, -0.253**       | 0.321**        | -0.003 | 0.001 | (-0.005, -0.001) | 0.007   | -0.001 |
| SES→ GWG not below IOM                                                  | -0.045                 | 0.321**        | -0.014 | 0.013 | (-0.039, 0.011)  | 0.273   | -0.006 |
| SES→ Pre-BMI≥18.50                                                      | 0.033*                 | -0.274**       | -0.009 | 0.003 | (-0.015, -0.003) | 0.010   | -0.004 |
| SES→ a multi-vitamin supplement during the first trimester of pregnancy | 0.317**                | -0.066*        | -0.021 | 0.008 | (-0.037, -0.005) | 0.010   | -0.009 |
| SES→ Physical activity during the last trimester of pregnancy           | 0.284**                | 0.017          | 0.005  | 0.003 | (-0.001, 0.011)  | 0.063   | 0.002  |
| SES→ Sleep quality in the month before the birth                        | 0.150**                | 0.027          | 0.004  | 0.004 | (-0.004, 0.012)  | 0.297   | 0.002  |
| SES→ PIH                                                                | -0.176*                | 0.166**        | -0.029 | 0.013 | (-0.054, -0.004) | 0.021   | -0.013 |
| Goodness-of-fit                                                         | RMSEA=0.012, CFI=0.967 |                |        |       |                  |         |        |

B, unstandardized coefficient; CI, confidence interval; B, standardized coefficient, \* $P < 0.05$ , \*\* $P < 0.001$ . RMSEA, the root mean square error of approximation; CFI, the comparative fit index; SES, socio-economic status; GWG, gestation weight gain; IOM, Institute of Medicine. Covariates of maternal age, passive smoking during pregnancy were adjusted for SGA.

1  
2  
3  
4  
5 223 **DISCUSSION**  
6  
7

8 224 The findings of our study indicated that high SES was related to a reduced risk of  
9  
10 225 SGA after adjustment for potential confounders. In the pathway analysis, the direct  
11  
12 226 effect was not significant. These mediators completely mediated the relationship  
13  
14 227 between SES and SGA. We observed that PIH, taking a multi-vitamin supplement  
15  
16 228 during the first trimester of pregnancy, pre-pregnancy underweight and GWG below  
17  
18 229 IOM were the mediators between SES and SGA.  
19  
20  
21

22  
23 230 One of the strengths of our study was the large sample size. In addition, face-to-face  
24  
25 231 interviews, medical records and measurements provided rich covariate data, which  
26  
27 232 allowed us to adjust for potential confounders for SGA. Thirdly, SES was combined  
28  
29 233 parental education and occupation which was more robust compared with education  
30  
31 234 and occupation separately in China. We acknowledge that there were also some  
32  
33 235 limitations. Firstly, information on education and occupation was obtained using  
34  
35 236 face-to-face questionnaires, which might have bias. Occupation can fluctuate over  
36  
37 237 time, and it is more likely to lead to misclassification. Secondly, although we carefully  
38  
39 238 adjusted for several potential confounders for SGA, we were unlikely to fully rule out  
40  
41 239 the possibility of residual confounding by other unmeasured factors such as parents'  
42  
43 240 history of SGA, maternal stress during pregnancy. Thirdly, some of our variables  
44  
45 241 including a micronutrient supplement, physical activity and sleep quality during  
46  
47 242 pregnancy relied on self-reporting, which were subjective.  
48  
49

50  
51  
52  
53  
54  
55 243 Predictably, high SES was a protector of SGA in our study. A large  
56

1  
2  
3  
4 244 population-based study from Finland reported that SES determined by women's  
5  
6 245 occupation was inversely associated with the risk of SGA.<sup>12</sup> A birth cohort study  
7  
8 246 conducted in France reported that low SES determined by neighbourhood deprivation  
9  
10  
11 247 may affect foetal growth, especially in rural areas.<sup>22</sup> These two studies were consistent  
12  
13 248 with our results. However, Clayborne et al. did not find a direct association between  
14  
15 249 SES measured by neighborhood deprivation and the risk of SGA in Canada.<sup>23</sup> Because  
16  
17  
18 250 of the different measures of SES, these studies may not be easily compared. The  
19  
20  
21 251 underlying mechanisms responsible for increased risk of SGA among primiparae with  
22  
23 252 low SES remain speculative. In our study, we found that some mediators could  
24  
25 253 completely mediate SES and SGA.

26  
27  
28 254 In the pathway analysis, we observed that PIH was a mediator between SES and  
29  
30 255 SGA. We demonstrated that SES was associated with PIH among primiparae. A  
31  
32  
33 256 meta-analysis including 51 studies found that low SES was associated with higher  
34  
35 257 blood pressure. This association was particularly evident in the level of education.<sup>24</sup>  
36  
37  
38 258 Adherence to knowledge of hypertension and more social resources to maintain  
39  
40 259 healthy behaviours could explain why SES likely affects PIH among pregnant women.  
41  
42  
43 260 The rate of SGA infants from the PIH group was significantly higher compared with  
44  
45 261 the no PIH group in our study. PIH is associated with a reduction in placental  
46  
47 262 perfusion, which influences the size of the placenta.<sup>25</sup> In SGA infants, the size of the  
48  
49  
50 263 placental disc was smaller and the birthweight was lighter.<sup>26</sup> Placenta is an important  
51  
52  
53 264 organ for foetus and supplies all the nutrients needed for foetal development. The  
54  
55 265 pathology of placental was potentially causing or contributing to SGA and

1  
2  
3  
4 266 hypertension was one of the factors in aetiology.<sup>27</sup> The growth and development of the  
5  
6 267 placenta being influenced by PIH may be suggested an explanation for lower  
7  
8 268 birthweight.<sup>26</sup>  
9

10  
11 269 Taking a multi-vitamin supplement during the first trimester of pregnancy was  
12  
13 270 another mediator between SES and SGA. Women with low SES defined by family  
14  
15 271 income had less chance to obtain optimal nutrient supplements in a meta-analysis  
16  
17 272 including 12 randomized controlled trials.<sup>28</sup> A double-blind cluster randomized  
18  
19 273 controlled trial in rural China reported birthweight was 42 g higher in the multiple  
20  
21 274 micronutrients group compared with the folic acid group.<sup>29</sup> Another birth cohort from  
22  
23 275 Denmark reported that regular periconceptional multi-vitamins use was associated  
24  
25 276 with a reduced risk of SGA births.<sup>30</sup> A multi-vitamin supplement during early  
26  
27 277 pregnancy might reduce the risk of alcohol use in relation to SGA.<sup>31</sup> This result  
28  
29 278 evidenced that a multi-vitamin supplement during early pregnancy was a protector  
30  
31 279 factor for SGA, which was similar to our study. Multi-vitamins are important for  
32  
33 280 human physical function and they play vital roles in numerous metabolic processes  
34  
35 281 and physiological functions in the human body. A multi-vitamin supplement during  
36  
37 282 pregnancy reduced the risk of pregnancy complications, involving oxidative stress and  
38  
39 283 pre-eclampsia. Pre-eclampsia could decrease blood to the placenta, which causes  
40  
41 284 growth retardation.<sup>32</sup>  
42  
43  
44  
45  
46  
47  
48  
49

50 285 Pre-pregnancy underweight and pre-pregnancy underweight to GWG below IOM  
51  
52 286 were the two pathways between SES and SGA. The chances of having a SGA infant  
53  
54 287 was significantly higher among underweight women compared to normal  
55  
56  
57  
58  
59  
60

1  
2  
3 288 pre-pregnancy BMI in our study, which was consistent with a study in Lebanon. As  
4  
5  
6 289 Lebanon is a developing country in Asia, and its people are similar to Chinese people,  
7  
8 290 we deemed these results could support our findings. Smoking, poor diet, and medical  
9  
10 291 illness like anaemia which are risk factors for SGA among underweight women,  
11  
12  
13 292 occurred more often. Deficiency of maternal plasma volume among underweight  
14  
15 293 women has been suggested as a cause of SGA.<sup>33</sup> In our study, underweight women  
16  
17 294 were more likely to have insufficient weight gain during pregnancy and below normal  
18  
19 295 weight gain significantly increased the odds of SGA. As expected, GWG below IOM  
20  
21 296 in women with pre-pregnancy underweight was reportedly more likely to affect the  
22  
23 297 birthweight of their neonates.<sup>34</sup> Poor nutrition or unhealthy psychological state among  
24  
25 298 pregnant women with GWG below IOM may explain causes of SGA.  
26  
27  
28  
29  
30

## 31 299 **CONCLUSION**

32  
33  
34  
35 300 We demonstrated that SES was inversely associated with SGA after adjustment for  
36  
37 301 potential confounders among primiparae. In this population, we also found that  
38  
39 302 mediators could completely mediate SES and SGA. Monitoring of blood pressure,  
40  
41 303 avoiding pre-pregnancy underweight, keeping normal GWG during pregnancy and  
42  
43 304 taking a multi-vitamin supplement during the first trimester of pregnancy are practical  
44  
45 305 and feasible measurements to reduce the risk of SGA. As we all know, SGA is a  
46  
47 306 public health issue and SES disparities are difficult to change over a short time. It had  
48  
49 307 great sense to maintain normal blood pressure and keep a healthy lifestyle to reduce  
50  
51 308 cases of SGA infants among primiparae, especially for women of child-bearing age  
52  
53  
54  
55  
56  
57  
58  
59  
60

1  
2  
3  
4 309 who are have a low SES. A future research direction should focus on identifying  
5  
6 310 interventions to successfully reduce socio-economic disparities in SGA.  
7  
8  
9

10 311 **Acknowledgements**

11  
12  
13 312 We thank all the study participants and the entire HBC Study team for their generous  
14  
15 313 help. This research was supported by National Natural Science Foundation of China  
16  
17  
18 314 (81673194, 21437002 and 81372959). Project from Health and Family Planning  
19  
20 315 Commission of Hubei Province (WJ2015MB019).  
21  
22  
23

24 316 **Disclosure of interests**

25  
26  
27  
28 317 The authors declare that there is no competing interest including relevant financial,  
29  
30 318 personal, political, intellectual or religious interests.  
31  
32  
33

34 319 **Contribution to Authorship**

35  
36  
37  
38 320 X.L. contributed to acquisition of data, statistical analysis, interpretation of data and  
39  
40 321 manuscript writing. F.L.L., H.T.G., F.H., X.Y.X., X.L., H.M., S.Q.X., interpretation of  
41  
42 322 the data. J.J.Z., R.R.S. supervised the project and wrote the manuscript. All authors  
43  
44 323 approved the final version to be published. R.R.S. is the guarantor of this work.  
45  
46  
47  
48

49 324 **Details of Ethics Approval**

50  
51  
52  
53 325 The research protocol was approved by the ethics committees of the Tongji Medical  
54  
55 326 College, Huazhong University of Science and Technology, and the Women and  
56  
57  
58  
59  
60

1  
2  
3 327 Children Medical and Healthcare Centre of Wuhan. All participating women provided  
4  
5  
6 328 their written informed consent at the time of recruitment.  
7  
8

9  
10 329 **Funding**  
11

12  
13 330 This work was supported by National Natural Science Foundation of China  
14  
15 331 (81673194, 21437002 and 81372959). Project from Health and Family Planning  
16  
17 332 Commission of Hubei Province (WJ2015MB019).  
18  
19  
20

21  
22 333 **Data sharing statement**  
23

24  
25  
26 334 No additional data is available.  
27  
28

29  
30 335 **REFERENCES**  
31

- 32  
33 336 1. Alexander GR, Himes JH, Kaufman RB, Mor J, Kogan M. A United States  
34  
35 337 national reference for fetal growth. *Obstet Gynecol.* 1996;87(2):163-168.  
36  
37 338 2. Qiu X, Lodha A, Shah PS, et al. Neonatal outcomes of small for gestational  
38  
39 339 age preterm infants in Canada. *Am J Perinatol.* 2012;29(2):87-94.  
40  
41 340 3. Risnes KR, Vatten LJ, Baker JL, et al. Birthweight and mortality in adulthood:  
42  
43 341 a systematic review and meta-analysis. *Int J Epidemiol.* 2011;40(3):647.  
44  
45 342 4. Mwaniki MK, Atieno M, Lawn JE, Newton CRJC. Long-term  
46  
47 343 neurodevelopmental outcomes after intrauterine and neonatal insults: a  
48  
49 344 systematic review. *Lancet.* 2012;379(9814):445-452.  
50  
51 345 5. Lee AC, Katz J, Blencowe H, et al. National and regional estimates of term  
52  
53  
54  
55  
56  
57



- 1  
2  
3 346 and preterm babies born small for gestational age in 138 low-income and  
4  
5  
6 347 middle-income countries in 2010. *Lancet Glob Health*. 2013;1(1):e26.  
7  
8 348 6. Meersseman W, Verschueren P, Tousseyn T, De Vos R, Cassiman D. A global  
9  
10 349 reference for fetal-weight and birthweight percentiles. *Lancet*.  
11  
12 350 2011;377(9780):1890.  
13  
14  
15 351 7. Gaudineau A. Prevalence, risk factors, maternal and fetal morbidity and  
16  
17 352 mortality of intrauterine growth restriction and small-for-gestational age. *J*  
18  
19 353 *Gynecol Obstet Biol Reprod*. Dec 2013;42(8):895-910.  
20  
21  
22 354 8. Huang H, Wan Mohamed Radzi CW, Salarzadeh Jenatabadi H. Family  
23  
24 355 Environment and Childhood Obesity: A New Framework with Structural  
25  
26 356 Equation Modeling. *Int J Environ Res Public Health*. Feb 13 2017;14(2).  
27  
28  
29 357 9. Fujiwara T, Ito J, Kawachi I. Income inequality, parental socioeconomic status,  
30  
31 358 and birth outcomes in Japan. *Am J Epidemiol*. May 15  
32  
33 359 2013;177(10):1042-1052.  
34  
35  
36 360 10. Herzog B, Lacruz ME, Haerting J, et al. Socioeconomic status and  
37  
38 361 anthropometric changes-A meta-analytic approach from seven German cohorts.  
39  
40 362 *Obesity*. Mar 2016;24(3):710-718.  
41  
42  
43 363 11. Patra K, Greene MM, Patel AL, Meier P. Maternal Education Level Predicts  
44  
45 364 Cognitive, Language, and Motor Outcome in Preterm Infants in the Second  
46  
47 365 Year of Life. *Am J Perinatol*. Jul 2016;33(8):738-744.  
48  
49  
50 366 12. Räisänen S, Gissler M, Sankilampi U, Saari J, Kramer MR, Heinonen S.  
51  
52 367 Contribution of socioeconomic status to the risk of small for gestational age  
53  
54  
55  
56  
57  
58  
59  
60

- 1  
2  
3 368 infants – a population-based study of 1,390,165 singleton live births in Finland.  
4  
5  
6 369 *Int J Equity Health*. 2013;12(1):1-8.  
7  
8 370 13. Ng SK, Cameron CM, Hills AP, McClure RJ, Scuffham PA. Socioeconomic  
9  
10 371 disparities in prepregnancy BMI and impact on maternal and neonatal  
11  
12 372 outcomes and postpartum weight retention: the EFHL longitudinal birth cohort  
13  
14 373 study. *BMC Pregnancy Childbirth*. 2014;14(1):314.  
15  
16 374 14. Leung JYY, Leung GM, Schooling CM. Socioeconomic disparities in preterm  
17  
18 375 birth and birth weight in a non-Western developed setting: evidence from  
19  
20 376 Hong Kong's 'Children of 1997' birth cohort. *J. Epidemiol. Community Health*.  
21  
22 377 Nov 2016;70(11):1074-1081.  
23  
24 378 15. Wang F, Sociology DO. Socioeconomic Status,Lifestyle and Health Inequality.  
25  
26 379 *Chinese Journal of Sociology*. Mar 2012;32(2):125.  
27  
28 380 16. Kramer MS, Seguin L, Lydon J, Goulet L. Socio-economic disparities in  
29  
30 381 pregnancy outcome: why do the poor fare so poorly? *Paediatr Perinat*  
31  
32 382 *Epidemiol*. Jul 2000;14(3):194-210.  
33  
34 383 17. Glinianaia, V S, Rankin, et al. No improvement in socioeconomic inequalities  
35  
36 384 in birthweight and preterm;birth over four decades: a population-based cohort  
37  
38 385 study. *Bmc Public Health*. 2013;13(1):345.  
39  
40 386 18. Song L, Shen L, Li H, et al. Socio-economic status and risk of gestational  
41  
42 387 diabetes mellitus among Chinese women. *Diabet Med*. Oct 21  
43  
44 388 2017;34(10):1421-1427.  
45  
46 389 19. Ma SX, Wang FL, Zhang P. Effect of increase amplitudes of pre-pregnancy  
47  
48  
49  
50  
51  
52  
53  
54  
55  
56  
57  
58  
59  
60

- 1  
2  
3 390 body mass index and gestational body mass index on pregnancy outcomes.  
4  
5  
6 391 *Maternal & Child Health Care of China*. 2010.  
7  
8 392 20. Zhao SC, Xia M, Tang JC, Yan Y. Associations between metabolic syndrome  
9  
10 393 and clinical benign prostatic hyperplasia in a northern urban Han Chinese  
11  
12 394 population: A prospective cohort study. *Sci Rep*. Sep 22 2016;6:33933.  
13  
14  
15 395 21. Kantomaa MT, Stamatakis E, Kankaanpaa A, et al. Physical activity and  
16  
17 396 obesity mediate the association between childhood motor function and  
18  
19 397 adolescents' academic achievement. *Proc Natl Acad Sci U S A*. Jan 29  
20  
21 398 2013;110(5):1917-1922.  
22  
23  
24 399 22. Bertin M, Viel JF, Monfort C, Cordier S, Chevrier C. Socioeconomic  
25  
26 400 Disparities in Adverse Birth Outcomes in Urban and Rural Contexts: a French  
27  
28 401 Mother-Child Cohort. *Paediatr Perinat Epidemiol*. 2015;29(5):426-435.  
29  
30  
31 402 23. Clayborne ZM, Giesbrecht GF, Bell RC, Tomfohr-Madsen LM. Relations  
32  
33 403 between neighbourhood socioeconomic status and birth outcomes are  
34  
35 404 mediated by maternal weight. *Soc Sci Med*. 2017;175:143-151.  
36  
37  
38 405 24. Leng B, Jin Y, Li G, Chen L, Jin N. Socioeconomic status and hypertension: a  
39  
40 406 meta-analysis. *J Hypertens*. 2015;33(2):221-229.  
41  
42  
43 407 25. Chisholm KM, Folkins AK. Placental and Clinical Characteristics of Term  
44  
45 408 Small-for-Gestational-Age Neonates: A Case-Control Study. *Pediatr Dev*  
46  
47 409 *Pathol*. Jan-Feb 2016;19(1):37-46.  
48  
49  
50 410 26. Phad N, Dahlstrom JE, Ellwood D, Kent AL. The effect of pregnancy-induced  
51  
52 411 hypertensive disorders on placental growth along short and long axes and  
53  
54  
55  
56  
57  
58  
59  
60

- 1  
2  
3 412 neonatal outcomes. *Aust N Z J Obstet Gynaecol*. Jun 2015;55(3):239-244.
- 4  
5  
6 413 27. Thorne J, Downey P, Mooney EE. Placental pathology associated with small  
7  
8 414 for gestational age infants. *Ir Med J*. 2014;107(8):249-250.
- 9  
10  
11 415 28. Carine R, Fisher DJ, Osmond C, Margetts BM, Fall CHD. Multiple  
12  
13 416 micronutrient supplementation during pregnancy in low-income countries: a  
14  
15 417 meta-analysis of effects on stillbirths and early and late neonatal mortality.  
16  
17 418 *Food Nutr Bull*. 2009;30(4 Suppl):S547-S555.
- 18  
19  
20 419 29. Zeng L, Dibley MJ, Cheng Y, et al. Impact of micronutrient supplementation  
21  
22 420 during pregnancy on birth weight, duration of gestation, and perinatal  
23  
24 421 mortality in rural western China: double blind cluster randomised controlled  
25  
26 422 trial. *BMJ*. Nov 07 2008;337:a2001.
- 27  
28  
29 423 30. Catov JM, Bodnar LM, Olsen J, Olsen S, Nohr EA. Periconceptual  
30  
31 424 multivitamin use and risk of preterm or small-for-gestational-age births in the  
32  
33 425 Danish National Birth Cohort. *Am J Clin Nutr*. 2011;94(3):906.
- 34  
35  
36 426 31. Avalos LA, Kaskutas L, Block G, Abrams B, Li DK. Does lack of  
37  
38 427 multinutrient supplementation during early pregnancy increase vulnerability to  
39  
40 428 alcohol-related preterm or small-for-gestational-age births? *Matern Child*  
41  
42 429 *Health J*. 2011;15(8):1324-1332.
- 43  
44  
45 430 32. Roberts JM, Cooper DW. Pathogenesis and genetics of pre-eclampsia. *Lancet*.  
46  
47 431 Jan 06 2001;357(9249):53-56.
- 48  
49  
50 432 33. Buschur E, Kim C. Guidelines and interventions for obesity during pregnancy.  
51  
52 433 *Int J Gynaecol Obstet*. 2012;119(1):6-10.
- 53  
54  
55  
56  
57  
58  
59  
60

1  
2  
3  
4  
5  
6  
7  
8  
9  
10  
11  
12  
13  
14  
15  
16  
17  
18  
19  
20  
21  
22  
23  
24  
25  
26  
27  
28  
29  
30  
31  
32  
33  
34  
35  
36  
37  
38  
39  
40  
41  
42  
43  
44  
45  
46  
47  
48  
49  
50  
51  
52  
53  
54  
55  
56  
57  
58  
59  
60

434 34. Savitz DA, Stein CR, Siega-Riz AM, Herring AH. Gestational Weight Gain  
435 and Birth Outcome in Relation to Prepregnancy Body Mass Index and  
436 Ethnicity. *Ann Epidemiol.* 2011;21(2):78-85.  
437

For peer review only

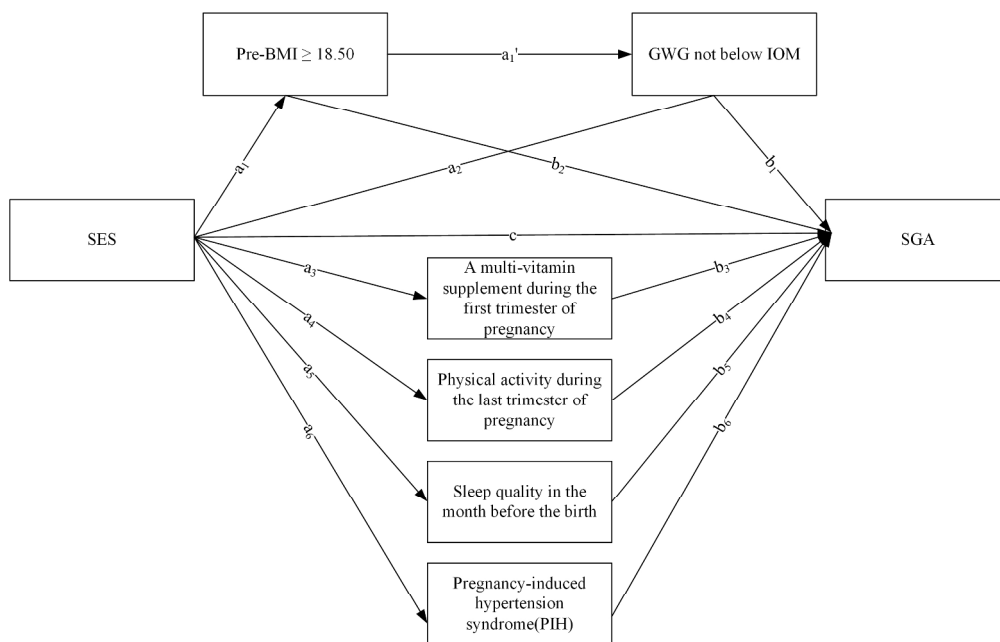

Figure 1. Pathway model of the associations between socio-economic status (SES) and small-for-gestational age (SGA). Unstandardized regression coefficients are  $a_1, a_1', a_2, a_3, a_4, a_5, a_6, b_1, b_2, b_3, b_4, b_5, b_6, c$ .

245x190mm (300 x 300 DPI)

Supplementary Table 1. Scores for coding education by number of years of school completed

| Category          | Total years | Scores |         |
|-------------------|-------------|--------|---------|
|                   |             | Males  | Females |
| Doctor            | 22          | 69     | 73      |
| Master            | 19          | 69     | 73      |
| college           | 16          | 63     | 66      |
| Junior school     | 15          | 61     | 63      |
| high school       | 12          | 52     | 53      |
| middle school     | 9           | 45     | 44      |
| Elementary school | 6           | 36     | 34      |
|                   | 3           | 33     | 32      |
|                   | 0           | 29     | 28      |

Supplementary Table 2. Average scores for categories of major occupational groups

| Major occupational groups | Category | Scores |
|---------------------------|----------|--------|
| Managerial workers        | I        | 59     |
| professionals & technical | II       | 63     |
| Office clerks             | III      | 56     |
| Service workers           | I        | 46     |
| Agriculture and forestry  | IV       | 34     |
| Laborer                   | V        | 42     |
| Soldier                   | VI       | 53     |
| Others                    | VII      | 49     |

Supplementary table 3. Correlation matrix of the study variables among primiparas in Wuhan, China (N=8737)

| Variables                                                          | 1        | 2        | 3       | 4        | 5        | 6      | 7        | 8        | 9       | 10       | 11 |
|--------------------------------------------------------------------|----------|----------|---------|----------|----------|--------|----------|----------|---------|----------|----|
| GWG by IOM                                                         | —        |          |         |          |          |        |          |          |         |          |    |
| Pre-BMI                                                            | -0.065** | —        |         |          |          |        |          |          |         |          |    |
| Physical activity during the last trimester of pregnancy           | -0.001   | 0.002    |         |          |          |        |          |          |         |          |    |
| Sleep quality in the month before the birth                        | -0.001   | 0.017    | -0.002  | —        |          |        |          |          |         |          |    |
| A multi-vitamin supplement during the first trimester of pregnancy | -0.008   | 0.019    | 0.110** | -0.031** | —        |        |          |          |         |          |    |
| Infant's gender                                                    | -0.002   | -0.012   | -0.003  | 0.005    | -0.008   | —      |          |          |         |          |    |
| Passive smoking during pregnancy                                   | -0.008   | -0.031** | -0.009  | 0.017    | 0.046**  | 0.004  | —        |          |         |          |    |
| Maternal age                                                       | -0.024*  | 0.133**  | -0.021* | -0.017   | 0.156**  | -0.015 | -0.020   | —        |         |          |    |
| PIH                                                                | -0.021*  | 0.058**  | -0.001* | -0.016   | -0.016   | 0.002  | -0.007   | 0.037**  | —       |          |    |
| SES                                                                | -0.020   | 0.069**  | 0.047** | 0.047**  | 0.147**  | -0.010 | -0.060** | 0.252**  | -0.023* | —        |    |
| SGA                                                                | 0.137**  | -0.077** | 0.016   | 0.012    | -0.036** | 0.008  | 0.007    | -0.040** | 0.035** | -0.039** | —  |

SES, socio-economic status; BMI, body mass index; GWG, gestation weight gain; IOM, Institute of Medicine; SGA, small-for-gestational age; AGA, appropriate-for-gestational age; PIH, pregnancy-induced hypertension syndrome. \* $P < 0.05$ , \*\* $P < 0.001$



1  
2  
3  
4  
5  
6  
7  
8  
9  
10  
11  
12  
13  
14  
15  
16  
17  
18  
19  
20  
21  
22  
23  
24  
25  
26  
27  
28  
29  
30  
31  
32  
33  
34  
35  
36  
37  
38  
39  
40  
41  
42  
43  
44  
45  
46  
47

For peer review only

**STROBE 2007 (v4) checklist of items to be included in reports of observational studies in epidemiology\***  
**Checklist for cohort, case-control, and cross-sectional studies (combined)**

| Section/Topic             | Item # | Recommendation                                                                                                                                                                                                                                                                                                                                                                                                                                                         | Reported on page # |
|---------------------------|--------|------------------------------------------------------------------------------------------------------------------------------------------------------------------------------------------------------------------------------------------------------------------------------------------------------------------------------------------------------------------------------------------------------------------------------------------------------------------------|--------------------|
| Title and abstract        | 1      | (a) Indicate the study's design with a commonly used term in the title or the abstract                                                                                                                                                                                                                                                                                                                                                                                 | 1-3                |
|                           |        | (b) Provide in the abstract an informative and balanced summary of what was done and what was found                                                                                                                                                                                                                                                                                                                                                                    | 2-3                |
| <b>Introduction</b>       |        |                                                                                                                                                                                                                                                                                                                                                                                                                                                                        |                    |
| Background/rationale      | 2      | Explain the scientific background and rationale for the investigation being reported                                                                                                                                                                                                                                                                                                                                                                                   | 4-6                |
| Objectives                | 3      | State specific objectives, including any pre-specified hypotheses                                                                                                                                                                                                                                                                                                                                                                                                      | 5-6                |
| <b>Methods</b>            |        |                                                                                                                                                                                                                                                                                                                                                                                                                                                                        |                    |
| Study design              | 4      | Present key elements of study design early in the paper                                                                                                                                                                                                                                                                                                                                                                                                                | 6                  |
| Setting                   | 5      | Describe the setting, locations, and relevant dates, including periods of recruitment, exposure, follow-up, and data collection                                                                                                                                                                                                                                                                                                                                        | 6-8                |
| Participants              | 6      | (a) <i>Cohort study</i> —Give the eligibility criteria, and the sources and methods of selection of participants. Describe methods of follow-up<br><i>Case-control study</i> —Give the eligibility criteria, and the sources and methods of case ascertainment and control selection. Give the rationale for the choice of cases and controls<br><i>Cross-sectional study</i> —Give the eligibility criteria, and the sources and methods of selection of participants | 6                  |
|                           |        | (b) <i>Cohort study</i> —For matched studies, give matching criteria and number of exposed and unexposed<br><i>Case-control study</i> —For matched studies, give matching criteria and the number of controls per case                                                                                                                                                                                                                                                 |                    |
| Variables                 | 7      | Clearly define all outcomes, exposures, predictors, potential confounders, and effect modifiers. Give diagnostic criteria, if applicable                                                                                                                                                                                                                                                                                                                               | 6-8                |
| Data sources/ measurement | 8*     | For each variable of interest, give sources of data and details of methods of assessment (measurement). Describe comparability of assessment methods if there is more than one group                                                                                                                                                                                                                                                                                   | 8-10               |
| Bias                      | 9      | Describe any efforts to address potential sources of bias                                                                                                                                                                                                                                                                                                                                                                                                              |                    |
| Study size                | 10     | Explain how the study size was arrived at                                                                                                                                                                                                                                                                                                                                                                                                                              | 10                 |
| Quantitative variables    | 11     | Explain how quantitative variables were handled in the analyses. If applicable, describe which groupings were chosen and why                                                                                                                                                                                                                                                                                                                                           |                    |
| Statistical methods       | 12     | (a) Describe all statistical methods, including those used to control for confounding                                                                                                                                                                                                                                                                                                                                                                                  | 8-9                |
|                           |        | (b) Describe any methods used to examine subgroups and interactions                                                                                                                                                                                                                                                                                                                                                                                                    |                    |
|                           |        | (c) Explain how missing data were addressed                                                                                                                                                                                                                                                                                                                                                                                                                            |                    |
|                           |        | (d) <i>Cohort study</i> —If applicable, explain how loss to follow-up was addressed<br><i>Case-control study</i> —If applicable, explain how matching of cases and controls was addressed                                                                                                                                                                                                                                                                              |                    |

|                          |     |                                                                                                                                                                                                              |       |
|--------------------------|-----|--------------------------------------------------------------------------------------------------------------------------------------------------------------------------------------------------------------|-------|
|                          |     | <i>Cross-sectional study</i> —If applicable, describe analytical methods taking account of sampling strategy                                                                                                 |       |
|                          |     | (e) Describe any sensitivity analyses                                                                                                                                                                        |       |
| <b>Results</b>           |     |                                                                                                                                                                                                              |       |
| Participants             | 13* | (a) Report numbers of individuals at each stage of study—eg numbers potentially eligible, examined for eligibility, confirmed eligible, included in the study, completing follow-up, and analysed            | 10    |
|                          |     | (b) Give reasons for non-participation at each stage                                                                                                                                                         | 10    |
|                          |     | (c) Consider use of a flow diagram                                                                                                                                                                           |       |
| Descriptive data         | 14* | (a) Give characteristics of study participants (eg demographic, clinical, social) and information on exposures and potential confounders                                                                     | 10-12 |
|                          |     | (b) Indicate number of participants with missing data for each variable of interest                                                                                                                          |       |
|                          |     | (c) <i>Cohort study</i> —Summarise follow-up time (eg, average and total amount)                                                                                                                             |       |
| Outcome data             | 15* | <i>Cohort study</i> —Report numbers of outcome events or summary measures over time                                                                                                                          |       |
|                          |     | <i>Case-control study</i> —Report numbers in each exposure category, or summary measures of exposure                                                                                                         |       |
|                          |     | <i>Cross-sectional study</i> —Report numbers of outcome events or summary measures                                                                                                                           | 12    |
| Main results             | 16  | (a) Give unadjusted estimates and, if applicable, confounder-adjusted estimates and their precision (eg, 95% confidence interval). Make clear which confounders were adjusted for and why they were included | 12-13 |
|                          |     | (b) Report category boundaries when continuous variables were categorized                                                                                                                                    |       |
|                          |     | (c) If relevant, consider translating estimates of relative risk into absolute risk for a meaningful time period                                                                                             |       |
| Other analyses           | 17  | Report other analyses done—eg analyses of subgroups and interactions, and sensitivity analyses                                                                                                               | 13-15 |
| <b>Discussion</b>        |     |                                                                                                                                                                                                              |       |
| Key results              | 18  | Summarise key results with reference to study objectives                                                                                                                                                     | 16    |
| Limitations              | 19  | Discuss limitations of the study, taking into account sources of potential bias or imprecision. Discuss both direction and magnitude of any potential bias                                                   | 16    |
| Interpretation           | 20  | Give a cautious overall interpretation of results considering objectives, limitations, multiplicity of analyses, results from similar studies, and other relevant evidence                                   | 16-19 |
| Generalisability         | 21  | Discuss the generalisability (external validity) of the study results                                                                                                                                        | 16-19 |
| <b>Other information</b> |     |                                                                                                                                                                                                              |       |
| Funding                  | 22  | Give the source of funding and the role of the funders for the present study and, if applicable, for the original study on which the present article is based                                                | 21    |

\*Give information separately for cases and controls in case-control studies and, if applicable, for exposed and unexposed groups in cohort and cross-sectional studies.

**Note:** An Explanation and Elaboration article discusses each checklist item and gives methodological background and published examples of transparent reporting. The STROBE checklist is best used in conjunction with this article (freely available on the Web sites of PLoS Medicine at <http://www.plosmedicine.org/>, Annals of Internal Medicine at <http://www.annals.org/>, and Epidemiology at <http://www.epidem.com/>). Information on the STROBE Initiative is available at [www.strobe-statement.org](http://www.strobe-statement.org).

# BMJ Open

## Pathways Linking Socio-economic Status to Small-for-Gestational Age (SGA) Infants among Primiparae: A Birth Cohort Study in China

|                               |                                                                                                                                                                                                                                                                                                                                                                                                                                                                                                                                                                                                                                                                                                                                                                                                                                                                                                                                                                                                                                                                                                                                                                                                                                                                                                                                                                                                                                                                                                                                                                                                                                                                                                                                                                                                                                                                                                                                                                                                                                                                                                                                                                                                                                                                                                                                                                |
|-------------------------------|----------------------------------------------------------------------------------------------------------------------------------------------------------------------------------------------------------------------------------------------------------------------------------------------------------------------------------------------------------------------------------------------------------------------------------------------------------------------------------------------------------------------------------------------------------------------------------------------------------------------------------------------------------------------------------------------------------------------------------------------------------------------------------------------------------------------------------------------------------------------------------------------------------------------------------------------------------------------------------------------------------------------------------------------------------------------------------------------------------------------------------------------------------------------------------------------------------------------------------------------------------------------------------------------------------------------------------------------------------------------------------------------------------------------------------------------------------------------------------------------------------------------------------------------------------------------------------------------------------------------------------------------------------------------------------------------------------------------------------------------------------------------------------------------------------------------------------------------------------------------------------------------------------------------------------------------------------------------------------------------------------------------------------------------------------------------------------------------------------------------------------------------------------------------------------------------------------------------------------------------------------------------------------------------------------------------------------------------------------------|
| Journal:                      | <i>BMJ Open</i>                                                                                                                                                                                                                                                                                                                                                                                                                                                                                                                                                                                                                                                                                                                                                                                                                                                                                                                                                                                                                                                                                                                                                                                                                                                                                                                                                                                                                                                                                                                                                                                                                                                                                                                                                                                                                                                                                                                                                                                                                                                                                                                                                                                                                                                                                                                                                |
| Manuscript ID                 | bmjopen-2017-020694.R1                                                                                                                                                                                                                                                                                                                                                                                                                                                                                                                                                                                                                                                                                                                                                                                                                                                                                                                                                                                                                                                                                                                                                                                                                                                                                                                                                                                                                                                                                                                                                                                                                                                                                                                                                                                                                                                                                                                                                                                                                                                                                                                                                                                                                                                                                                                                         |
| Article Type:                 | Research                                                                                                                                                                                                                                                                                                                                                                                                                                                                                                                                                                                                                                                                                                                                                                                                                                                                                                                                                                                                                                                                                                                                                                                                                                                                                                                                                                                                                                                                                                                                                                                                                                                                                                                                                                                                                                                                                                                                                                                                                                                                                                                                                                                                                                                                                                                                                       |
| Date Submitted by the Author: | 12-Mar-2018                                                                                                                                                                                                                                                                                                                                                                                                                                                                                                                                                                                                                                                                                                                                                                                                                                                                                                                                                                                                                                                                                                                                                                                                                                                                                                                                                                                                                                                                                                                                                                                                                                                                                                                                                                                                                                                                                                                                                                                                                                                                                                                                                                                                                                                                                                                                                    |
| Complete List of Authors:     | <p>Luo, Xiu; Tongji Medical College, Huazhong University of Science and Technology, Department of Maternal and Child Health and MOE (Ministry of Education) Key Laboratory of Environment and Health, School of Public Health</p> <p>Liu, Lingfei; Tongji Medical College, Huazhong University of Science and Technology, Department of Maternal and Child Health and MOE (Ministry of Education) Key Laboratory of Environment and Health, School of Public Health</p> <p>Gu, Huaiting; Tongji Medical College, Huazhong University of Science and Technology, Department of Maternal and Child Health and MOE (Ministry of Education) Key Laboratory of Environment and Health, School of Public Health</p> <p>Hou, Fang; Tongji Medical College, Huazhong University of Science and Technology, Department of Maternal and Child Health and MOE (Ministry of Education) Key Laboratory of Environment and Health, School of Public Health</p> <p>Xie, Xinyan; Huazhong University of Science and Technology Tongji Medical College, Department of Maternal and Child Health and MOE (Ministry of Education) Key Laboratory of Environment and Health, School of Public Health</p> <p>Li, Xin; Tongji Medical College, Huazhong University of Science and Technology, Department of Maternal and Child Health and MOE (Ministry of Education) Key Laboratory of Environment and Health, School of Public Health</p> <p>Meng, Heng; Tongji Medical College, Huazhong University of Science and Technology, Department of Maternal and Child Health and MOE (Ministry of Education) Key Laboratory of Environment and Health, School of Public Health</p> <p>Zhang, Jiajia; South Carolina College of Pharmacy - University of South Carolina Campus, Department of Epidemiology and Biostatistics, Arnold School of Public Health</p> <p>Xu, Shunqing; Tongji Medical College, Huazhong University of Science and Technology, Key Laboratory of Environment and Health, Ministry of Education &amp; Ministry of Environmental Protection, and State Key Laboratory of Environmental Health, School of Public Health</p> <p>Song, Ranran; Tongji Medical College, Huazhong University of Science and Technology, Department of Maternal and Child Health and MOE (Ministry of Education) Key Laboratory of Environment and Health, School of Public Health</p> |

1  
2  
3  
4  
5  
6  
7  
8  
9  
10  
11  
12  
13  
14  
15  
16  
17  
18  
19  
20  
21  
22  
23  
24  
25  
26  
27  
28  
29  
30  
31  
32  
33  
34  
35  
36  
37  
38  
39  
40  
41  
42  
43  
44  
45  
46  
47  
48  
49  
50  
51  
52  
53  
54  
55  
56  
57  
58  
59  
60

|                                    |                                                                                                           |
|------------------------------------|-----------------------------------------------------------------------------------------------------------|
| <b>Primary Subject Heading</b> :   | Public health                                                                                             |
| <b>Secondary Subject Heading</b> : | Epidemiology, Obstetrics and gynaecology, Paediatrics, Public health                                      |
| <b>Keywords</b> :                  | Hypertension < CARDIOLOGY, Epidemiology < INFECTIOUS DISEASES, Fetal medicine < OBSTETRICS, PUBLIC HEALTH |
|                                    |                                                                                                           |

SCHOLARONE™  
Manuscripts

For peer review only

1 **Pathways Linking Socio-economic Status to Small-for-Gestational Age (SGA)**

2 **Infants among Primiparae: A Birth Cohort Study in China**

3 Xiu Luo <sup>a</sup>, Lingfei Liu <sup>a</sup>, Huaiting Gu <sup>a</sup>, Fang Hou <sup>a</sup>, Xinyan Xie <sup>a</sup>, Xin Li <sup>a</sup>, Heng  
4 Meng <sup>a</sup>, Jiajia Zhang <sup>b</sup>, Shunqing Xu <sup>c</sup>, Ranran Song <sup>a\*</sup>

5 <sup>a</sup> Department of Maternal and Child Health and MOE (Ministry of Education) Key  
6 Laboratory of Environment and Health, School of Public Health, Tongji Medical  
7 College, Huazhong University of Science and Technology, Wuhan, China, 430030.

8 <sup>b</sup> Department of Epidemiology and Biostatistics, Arnold School of Public Health,  
9 University of South Carolina, Columbia, USA, 29208

10 <sup>c</sup> Key Laboratory of Environment and Health, Ministry of Education & Ministry of  
11 Environmental Protection, and State Key Laboratory of Environmental Health, School  
12 of Public Health, Tongji Medical College, Huazhong University of Science and  
13 Technology, Wuhan, China.

14  
15 \* Corresponding author: TEL: 86-27-836-57509;

16 E-mail address: [songranran@hust.edu.cn](mailto:songranran@hust.edu.cn)

17 Word count, 3318

18

19 **ABSTRACT**

20 **Objectives** Evidence about the relationship between socio-economic status (SES) and  
21 small-for-gestational age (SGA) infants was insufficient among Chinese primiparae.  
22 In addition, factors that may mediate this relationship are poorly understood. The  
23 purpose of this study was to investigate the risk of and mediators between SES and  
24 SGA.

25 **Design** Retrospective cohort study.

26 **Setting** Wuhan, Hubei, China.

27 **Method** Participants were recruited from patients who gave birth in the maternity care  
28 hospital of Wuhan between September 2012 and October 2014. Logistic regression  
29 models were used to estimate the association between SES and SGA. Pathway  
30 analysis was performed to examine the contribution of maternal lifestyles and  
31 pregnancy-induced hypertension syndrome (PIH) to the relationship between SES and  
32 SGA. Total effect, direct effect and indirect effect of SES on SGA were measured.  
33 Effect sizes were evaluated by unstandardized estimates ( $B$ ) and standardized  
34 estimates ( $\beta$ ).

35 **Results** Among 8737 primiparae, 927 (10.61%) pregnant women had babies with  
36 SGA. High SES was inversely associated with risk of SGA (OR, 0.856; 95% CI,  
37 0.737, 0.995) after adjustment for potential confounders. Maternal obstetric  
38 characteristics, lifestyles and PIH completely mediated SES and SGA (indirect effect:  
39  $B=-0.067$ , 95% CI= $-0.108$ ,  $-0.026$ ). The indirect effect of SES was strengthened by

1  
2  
3  
4 40 PIH (B=-0.029), a multi-vitamin supplement (B=-0.021), pre-pregnancy body mass  
5  
6 41 index (BMI)  $\geq 18.50$  (B=-0.009) and pre-pregnancy BMI  $\geq 18.50$  to gestational weight  
7  
8 42 gain (GWG) not below Institute of Medicine (IOM) recommendations (B=-0.003).

9  
10 43 **Conclusions** Women from high SES predicted lower risk of PIH, more chance to take  
11  
12 44 a multi-vitamin supplement during early pregnancy, keeping pre-pregnancy BMI  
13  
14 45  $\geq 18.50 \text{ kg/cm}^2$  and gaining adequate gestational weight which was not below IOM  
15  
16 46 recommendations. Furthermore, lower risk of PIH, more chance to take a  
17  
18 47 multi-vitamin supplement, pre-pregnancy BMI  $\geq 18.50 \text{ kg/cm}^2$  and GWG not below  
19  
20 48 IOM recommendations were associated with a lower risk of SGA infants.

21  
22 49 **Keywords** socio-economic status (SES), SGA, primiparae, mediators, pathway  
23  
24 50 analysis

25  
26  
27  
28  
29  
30  
31 51 **Strengths and limitations of this study**

32  
33  
34  
35 52 It was a large population-based cohort study of pregnant women in Wuhan, China.  
36  
37  
38 53 Face-to-face interviews, medical records and medical measurements provided rich  
39  
40 54 covariate data, which allowed us to adjust for potential confounders for SGA.  
41  
42  
43 55 SES index was combined with parental education and occupation. This index was  
44  
45 56 more representative and reasonable to represent SES compared with using only  
46  
47 57 education or occupation in China.

48  
49  
50 58 This is the first study evaluating maternal lifestyles and PIH, which mediate  
51  
52 59 socio-economic status (SES) and SGA among primiparae in China.

53  
54  
55 60 Some of our variables, such as a micronutrient supplement, physical activity and sleep



1  
2  
3  
4 61 quality during pregnancy relied on self-report, which are subjective.  
5  
6

7  
8 62 **Abbreviations**  
9

10  
11 63 **BMI** Body mass index  
12

13  
14 64 **GWG** Gestational weight gain  
15

16  
17 65 **IOM** Institute of Medicine  
18

19  
20 66 **SES** Socio-economic status  
21

22  
23 67 **SGA** Small-for-gestational age  
24

25  
26 68 **AGA** Appropriate-for-gestational age  
27

28  
29 69 **CI** Confidence interval  
30

31  
32 70 **OR** Odds ratio  
33

34  
35 71 **PIH** Pregnancy-induced hypertension syndrome  
36

37  
38 72 **INTRODUCTION**  
39

40  
41 73 Small-for-gestational age (SGA) infants is defined as birthweight below the tenth  
42

43  
44 74 percentile of a standard optimal reference population for a given gestational age and  
45

46  
47 75 sex.<sup>1</sup> SGA infants are at increased risk of perinatal morbidity and mortality<sup>2</sup> as well as  
48

49  
50 76 long-term adverse health<sup>3</sup> and developmental outcomes.<sup>4</sup> In 2010, the overall  
51

52  
53 77 prevalence of SGA infants was 27% of live births in 138 low- and middle-income  
54

55  
56 78 countries, using the Alexander reference population (US National Center for Health  
57

58  
59 79 Statistics, 1991; n=3,134,879 livebirths).<sup>5</sup> Another pooled country analysis research  
60

80 identified that the relative risks for babies who were SGA were 1.83 for neonatal

1  
2  
3  
4 81 mortality and 1.90 for post-neonatal mortality among 20 cohorts (providing data for  
5  
6 82 2,015,019 livebirths) from Asia, Africa and Latin America.<sup>6</sup> Therefore, it is important  
7  
8 83 to recognize the potential risk factors for SGA infants during pregnancy so that  
9  
10  
11 84 preventive measures can be targeted at risk subgroups of pregnant women. A review  
12  
13 85 from France found major risk factors identified were previous SGA birth, disease  
14  
15 86 during pregnancy, maternal underweight and socio-economic disadvantage.<sup>7</sup>  
16  
17  
18 87 Socio-economic disparities in SGA infants have been relatively intractable over the  
19  
20  
21 88 past decades. However, the mechanisms by which socio-economic disadvantage leads  
22  
23 89 to higher risk of SGA remain unclear.

24  
25 90 Socio-economic status (SES) is a complex phenomenon predicted by a broad  
26  
27  
28 91 spectrum of variables. It is often conceptualized as a combination of financial,  
29  
30  
31 92 occupational and educational influences.<sup>8</sup> The level of SES can partly explain the risk  
32  
33 93 at birth outcome,<sup>9</sup> children's anthropometric status,<sup>10</sup> and neurodevelopment.<sup>11</sup> The  
34  
35 94 risk of SGA was higher in the lower SES groups compared to the highest SES group  
36  
37  
38 95 in Finland,<sup>12</sup> Australia,<sup>13</sup> Japan<sup>9</sup> and others. These estimates were based mainly on  
39  
40  
41 96 findings from developed countries, with little reliable evidence from China. Moreover,  
42  
43 97 in the Hong Kong population, researchers demonstrated parental education, housing,  
44  
45 98 income and occupation were not clearly linearly associated with SGA.<sup>14</sup> As the  
46  
47  
48 99 economy of Hong Kong is more developed than that of China mainland, it makes  
49  
50  
51 100 great sense to explore the association between SES and SGA infants in mainland  
52  
53 101 China.

54  
55 102 Wang found that among 10,372 people from 28 provinces of China, those from

1  
2  
3  
4 103 high SES promoted their health via health-related lifestyles.<sup>15</sup> Another study reviewed  
5  
6 104 the evidence focusing on aetiological factors that could mediate the socio-economic  
7  
8 105 disparities in intrauterine growth restriction. Factors included maternal anthropometry,  
9  
10 106 micronutrients, physical activity, cigarette smoking and psychosocial factors.<sup>16</sup>  
11  
12  
13 107 However, this review used a bibliographic method to find these evidence and it was  
14  
15 108 hard to reveal mediators without the pathway analysis. Furthermore, the gap between  
16  
17  
18 109 the most and least deprived groups did not narrow for birthweight outcomes over the  
19  
20 110 four decades.<sup>17</sup> In the current study, we examined the association between SES and  
21  
22  
23 111 SGA infants and aimed to uncover one of the potential mechanisms that could show  
24  
25 112 how SES affects SGA infants among Chinese primiparae in the Health Baby Cohort  
26  
27  
28 113 (HBC).

## 31 114 **METHODS**

### 35 115 **Study Population**

36  
37  
38  
39 116 All participants were selected from the prospective Health Baby Cohort (HBC) study  
40  
41 117 in China, which has been described elsewhere.<sup>18</sup> It is an ongoing prospective cohort  
42  
43  
44 118 study, which aims to explore how environmental and genetic factors affect child  
45  
46 119 health and development. Participants who had had a stillborn infant were excluded.  
47  
48  
49 120 Briefly, the cohort enrolled 11,311 pregnant women who gave birth to a live singleton  
50  
51 121 infant in the Women and Children Medical and Health-care Centre of Wuhan between  
52  
53 122 September 2012 and October 2014. In our study, we selected 9623 primiparae and

1  
2  
3  
4 123 then, we excluded another 886 participants because of missing values in at least one  
5  
6 124 variable of interest, such as parental education and a multi-vitamin supplement.  
7  
8 125 Therefore, a total of 8737 primiparae were finally included in our study. The present  
9  
10 126 study was approved by the ethics committees of the Tongji Medical College,  
11  
12 127 Huazhong University of Science and Technology, and the Women and Children  
13  
14 128 Medical and Healthcare Centre of Wuhan. All participating women provided their  
15  
16 129 written informed consent at the time of recruitment.  
17  
18  
19  
20

### 21 130 **Diagnosis of SGA**

22  
23  
24 131 Birthweight and infant's gender were obtained from delivery records. Most of the  
25  
26 132 gestational age was calculated from the date of the last menstrual period (LMP) which  
27  
28 133 was recorded on their clinical cases. We estimated gestational age by B-mode  
29  
30 134 ultrasound if the date of LMP couldn't be obtained. We didn't exclude any specific  
31  
32 135 gestational weeks from our studied population. Labour and delivery outcomes were  
33  
34 136 extracted from birth records. Nude birthweight was measured for each infant within  
35  
36 137 one hour after birth by trained nurses using standardized procedures. We defined  
37  
38 138 small-for-gestational age (SGA) as a birthweight lower than the 10th percentile of our  
39  
40 139 population for a given gestational age and sex.<sup>6</sup> On the other hand, we defined  
41  
42 140 appropriate for gestational age (AGA) as a birthweight equal to or higher than the  
43  
44 141 10th centile for gestational age.  
45  
46  
47  
48  
49  
50  
51  
52  
53  
54  
55  
56  
57  
58  
59  
60

## 142 **Assessment of Covariates**

143 The trained nurses conducted standardized face-to-face interviews with the  
144 participants after delivery. Participants were asked to complete a questionnaire that  
145 collected information on maternal age, maternal and paternal education level (years of  
146 education), occupations (eight major categories of Chinese occupation), the use of a  
147 multi-vitamin supplement during the first trimester of pregnancy (yes or no), physical  
148 activity during the last trimester of pregnancy (almost none, 1–2 days, 3–4 days, 5–6  
149 days, 7 days) per week, and sleep quality in the month before the birth (bad or good).  
150 Information regarding pregnancy-induced hypertension syndrome (PIH) was extracted  
151 from medical records excluding chronic hypertension. PIH was defined as “yes” or  
152 “no”. We calculated pre-pregnancy body mass index (BMI) from the self-reported  
153 pre-pregnancy weight in kg divided by height in m<sup>2</sup>. BMI was categorized into four  
154 groups based on recommendations by the Working Group on Obesity in China of the  
155 Chinese Ministry of Health: underweight (<18.5 kg/m<sup>2</sup>); normal weight (18.5–23.9  
156 kg/m<sup>2</sup>); overweight (24–27.9 kg/m<sup>2</sup>); and obese (≥ 28 kg/m<sup>2</sup>).<sup>19</sup> Gestational weight  
157 gain (GWG) was calculated by subtracting the pre-pregnancy weight from the weight  
158 measured within 3 days of the delivery day. GWG was also categorized as below,  
159 within, or above the recommendations according to the Institute of Medicine (IOM).  
160 Specifically, GWG within the IOM recommendations was defined as 12.5–18.0 kg,  
161 11.5–16.0 kg, 7.0–11.5 kg and 5.0–9.0 kg for underweight, normal weight, overweight,  
162 and obese women, respectively.<sup>20</sup> Finally, we changed pre-pregnancy BMI and GWG  
163 by IOM recommendations as dichotomous variable (pre-pregnancy BMI<18.50 or

1  
2  
3  
4 164  $\geq 18.50$ ; GWG below IOM recommendations or not below).  
5  
6

7 165 **Assessment of Socio-economic Status**  
8  
9

10 166 SES index was measured by a combination of the education and occupation categories.

11  
12 167 The scores of education and occupation are listed in Supplementary table 1 and

13  
14  
15 168 Supplementary table 2.<sup>21</sup> SES index was measured based on the formula,  $SES = ((0.7 *$

16  
17 169 maternal education) + (0.4 \* maternal occupation) + (0.7 \* paternal education) + (0.4\*

18  
19  
20 170 paternal occupation))/2.<sup>22</sup> Finally, the SES index categorization demonstrates that

21  
22 171 below one third of the study population distribution had low SES and the remainder

23  
24  
25 172 had high SES.<sup>23</sup>  
26  
27

28 173 **Statistical Analysis**  
29  
30

31 174 Firstly, data were described as mean  $\pm$  SD for continuous variables or as percentage

32  
33 175 for categorical variables. Differences between SGA and AGA were compared using

34  
35 176 the Student's t-test for continuous variables and chi-square test for categorical

36  
37 177 variables. Pearson's correlation was carried out between studied variables. Univariate

38  
39 178 logistic regression analysis was used to assess the risk of having a SGA newborn

40  
41 179 among primiparae from low SES. Multivariate logistic regressions were used to

42  
43 180 explore the risk after adjustment for potential confounders. We selected the list of

44  
45 181 potential confounders according to two reasons as following. Firstly, variables, such

46  
47 182 as maternal age, pre-pregnancy BMI, gestational weight gain (GWG) and a

48  
49 183 multi-vitamin supplement during the first trimester of pregnancy, were significant  
50  
51  
52  
53  
54  
55  
56  
57  
58  
59  
60

1  
2  
3  
4 184 different between two groups according to the results of single factor analysis.  
5  
6 185 Secondly, other confounders (sleep quality in the month before the birth, physical  
7  
8 186 activity during last trimester and passive smoking during pregnancy) were all the  
9  
10  
11 187 lifestyles of pregnancy women. As these lifestyles associated with infants' birth  
12  
13 188 weight were repeatedly reported by literatures, we added them in model 2 although  
14  
15 189 they were not significant. Basing on model 2, we brought in PIH as another  
16  
17  
18 190 confounder in model 3. PIH was an obvious risk factor according to the literature  
19  
20  
21 191 review where women with PIH had twice the risk of having a SGA, compared with  
22  
23 192 women having no PIH.<sup>7</sup>

24  
25 193 Secondly, we used the pathway analysis to explore the hypothesized underlying  
26  
27  
28 194 relations between variables of interested. The model was evaluated using the  
29  
30  
31 195 following goodness-of-fit: the comparative-fit index (CFI)>0.95, the  
32  
33 196 root-mean-square error of approximation (RMSEA)<0.05. Modification indices were  
34  
35 197 used to detect misspecifications in the model. Estimation was carried out by a robust  
36  
37  
38 198 weighted least-squares estimator (WLSMV). Because most of our variables were  
39  
40  
41 199 categorical variables, WLSMV was one of the best methods for analysing our data set.  
42  
43 200 Effect sizes of the predictors on the outcome variables were expressed as  
44  
45 201 unstandardized estimates (B) and standardized estimates ( $\beta$ ). Indirect effect was  
46  
47 202 defined as the effect of the exposure that acted through a given set of mediators of  
48  
49  
50 203 interest. Direct effect was refer to the effect of the exposure unexplained by those  
51  
52 204 same mediators.<sup>24</sup> The total effects of the predictors on the outcomes were computed  
53  
54  
55 205 by adding the indirect and direct effects together.<sup>25</sup> Decoding of each response for

206 further analysis was present in table 1. All of the analyses were conducted with R

207 3.2.2. All *P* values reported were two-sided and 0.05 was used as significance level.

## 208 Patient Involvement

209 No patients were involved in setting the research question or the outcome measures,

210 nor were they involved in developing plans for recruitment, design, or implementation

211 of the study. No patients were asked to advise on interpretation or writing up of results.

212 There are no plans to disseminate the results of the research to study participants or

213 the relevant patient community.

214

Table 1. Description of variables in analysis.

| Variables                                                          | Decoding of each response                                                                                          |
|--------------------------------------------------------------------|--------------------------------------------------------------------------------------------------------------------|
| SES                                                                | 0="low", 1="high"                                                                                                  |
| GWG by IOM recommendations                                         | 0="below", 1="within and above"                                                                                    |
| Pre-pregnancy BMI                                                  | 0="<18.5", 1="≥18.5"                                                                                               |
| Physical activity during the last trimester of pregnancy           | 0="almost none per week", 1="1-2 days per week", 2="3-4 days per week", 4="5-6 days per week", 5="7 days per week" |
| Sleep quality in the month before the birth                        | 0="bad", 1="good"                                                                                                  |
| A multi-vitamin supplement during the first trimester of pregnancy | 0="no", 1="yes"                                                                                                    |
| Infant's gender                                                    | 0="girl", 1="boy"                                                                                                  |
| Passive smoking during pregnancy                                   | 0="no", 1="yes"                                                                                                    |
| PIH                                                                | 0="no", 1="yes"                                                                                                    |
| Maternal age                                                       | continuous variable                                                                                                |
| SGA                                                                | 0="no", 1="yes"                                                                                                    |

SES, socio-economic status; BMI, body mass index; GWG, gestational weight gain; IOM, Institute of Medicine; SGA, small-for-gestational age; PIH, pregnancy-induced hypertension syndrome.



1  
2  
3  
4 215 **RESULTS**  
5  
6

7 216 **Study Population**  
8  
9

10 217 A total of 8737 primiparae met our criterion and they finally included in our study.

11  
12  
13 218 The mean maternal age was  $27.70 \pm 3.24$  years. The range of gestational age was

14  
15 219 28-42 weeks. In total, 927 (10.61%) infants were diagnosed with SGA. There were

16  
17  
18 220 4499 boys and 4238 girls with a boy-to-girl ratio of 1.06.  
19  
20

21 221 **Characteristics of the Sample**  
22  
23

24  
25 222 The basic demographic characteristics among SGA are presented in table 2. Mean

26  
27 223 maternal age was younger, mean pre-pregnancy BMI was lower and gestational

28  
29 224 weight gain below IOM recommendations was more likely with women who had

30  
31  
32 225 SGA infants. Compared with women with AGA infants, women with SGA infants

33  
34 226 were more likely to have PIH and came from low SES. Women with AGA infants

35  
36  
37 227 tended to be more positive regarding taking a multi-vitamin supplement during the

38  
39 228 first trimester of pregnancy. Correlations of the variables are presented in

40  
41  
42 229 Supplementary table 3.  
43

44 230  
45  
46  
47  
48  
49  
50  
51  
52  
53  
54  
55  
56  
57  
58  
59  
60

Table 2. Characteristics of participants with SGA and AGA among primiparae in Wuhan, China (N=8737)

| Variables                                                          | N(%) or Mean $\pm$ SD | SGA                   | AGA                   | <i>P</i> |
|--------------------------------------------------------------------|-----------------------|-----------------------|-----------------------|----------|
|                                                                    |                       | N(%) or Mean $\pm$ SD | N(%) or Mean $\pm$ SD |          |
| GWG by IOM recommendations                                         |                       |                       |                       |          |
| Below                                                              | 901(10.31)            | 208(22.44)            | 693(9.89)             | <0.001   |
| Within and above                                                   | 7836(89.69)           | 719(77.56)            | 7117(90.11)           |          |
| Pre-pregnancy BMI                                                  |                       |                       |                       |          |
| <18.5                                                              | 2082(23.83)           | 309(33.33)            | 1773(21.74)           | <0.001   |
| $\geq$ 18.5                                                        | 6655(76.17)           | 618(66.67)            | 6037(78.26)           |          |
| Physical activity during the last trimester of pregnancy           |                       |                       |                       |          |
| almost none per week                                               | 834(9.55)             | 79(8.52)              | 755(8.65)             | 0.495    |
| 1-2 days per week                                                  | 831(9.51)             | 86(9.28)              | 745(8.98)             |          |
| 3-4 days per week                                                  | 663(7.59)             | 61(6.58)              | 602(7.83)             |          |
| 5-6 days per week                                                  | 146(1.67)             | 17(1.83)              | 129(1.86)             |          |
| every days per week                                                | 6263(71.68)           | 684(73.79)            | 5579(72.81)           |          |
| Sleep quality in the month before the birth                        |                       |                       |                       |          |
| Bad                                                                | 3063(35.06)           | 310(33.44)            | 2753(33.48)           | 0.275    |
| Good                                                               | 5674(64.94)           | 617(66.56)            | 5057(66.52)           |          |
| A multi-vitamin supplement during the first trimester of pregnancy |                       |                       |                       |          |
| No                                                                 | 3640(41.66)           | 434(46.82)            | 3206(36.51)           | 0.001    |
| Yes                                                                | 5097(58.34)           | 493(53.18)            | 4604(63.49)           |          |
| Infant's gender                                                    |                       |                       |                       |          |
| Boy                                                                | 4499(51.49)           | 467(50.38)            | 4032(51.86)           | 0.517    |
| Girl                                                               | 4238(48.51)           | 460(49.62)            | 3778(48.14)           |          |
| Passive smoking during pregnancy                                   |                       |                       |                       |          |
| No                                                                 | 7717(88.33)           | 813(87.7)             | 5206(89.7)            | 0.532    |
| Yes                                                                | 1020(11.67)           | 114(12.3)             | 598(10.3)             |          |
| Maternal age                                                       | 27.70 $\pm$ 3.24      | 27.32 $\pm$ 3.50      | 27.75 $\pm$ 3.21      | <0.001   |
| PIH                                                                |                       |                       |                       |          |
| No                                                                 | 8468(96.92)           | 882(95.15)            | 7586(97.13)           | 0.001    |
| Yes                                                                | 269(3.08)             | 45(4.85)              | 224(2.87)             |          |
| SES                                                                |                       |                       |                       |          |
| Low                                                                | 927(10.61)            | 361(38.94)            | 2572(9.82)            | <0.001   |
| High                                                               | 7810(89.39)           | 566(61.06)            | 5238(75.45)           |          |

SES, socio-economic status; BMI, body mass index; GWG, gestational weight gain; IOM, Institute of Medicine; SGA, small-for-gestational age; PIH, pregnancy-induced hypertension syndrome; AGA, appropriate-for-gestational age.

### 231 Associations between SES and SGA

232 To examine the association between SES and the risk of SGA, univariate and

233 multivariate logistic regression models were used in table 3. Compared with women  
 234 with low SES, the OR of SGA was 0.770 (95% CI, 0.669, 0.886) for those with high  
 235 SES, in the unadjusted model. After adjustment for potential confounders, the ORs of  
 236 SGA were 0.846 (95% CI, 0.728, 0.983) and 0.856 (95% CI, 0.737, 0.995) in model 2  
 237 and model 3, respectively.

Table 3. Associations of SES with SGA among 8737 primiparae in Wuhan, China.

| SGA     | SES  | OR    | 95%CI        | <i>P</i> |
|---------|------|-------|--------------|----------|
| Model 1 | Low  | Ref   |              |          |
|         | High | 0.770 | 0.669, 0.886 | <0.001   |
| Model 2 | Low  | Ref   |              |          |
|         | High | 0.846 | 0.728,0.983  | 0.029    |
| Model 3 | Low  | Ref   |              |          |
|         | High | 0.856 | 0.737,0.995  | 0.043    |

ORs, odds ratios; SES, socio-economic status; SGA, small-for-gestational age; Model 1, unadjusted model; model 2 adjusted for maternal age, pre-pregnancy BMI, gestational weight gain (GWG), a multi-vitamin supplement during the first trimester of pregnancy, sleep quality in the month before the birth, physical activity during last trimester and passive smoking during pregnancy; model 3 adjusted as model 2 plus PIH.

### 238 **Mediation Model for SGA**

239 We proposed a hypothetical model for SGA in Figure 1, including the mediators PIH,  
 240 a multi-vitamin supplement during first-trimester, pre-pregnancy BMI, GWG by IOM  
 241 recommendations, physical activity during the last trimester of pregnancy and sleep  
 242 quality in the month before the birth. Covariates (maternal age and passive smoking  
 243 during pregnancy) were added in pathway analysis to control potential relations. table  
 244 4 listed SGA with the best CFI and RMSEA, which were 0.012 and 0.967. This model  
 245 revealed that maternal obstetric characteristics, lifestyles and PIH completely  
 246 mediated SES and SGA. The indirect effect of SES was strengthened in SGA

1  
2  
3  
4 247 (B=-0.067, 95% CI=-0.108, -0.026) via PIH (B=-0.029,  $P=0.021$ ), a multi-vitamin  
5  
6 248 supplement (B=-0.021,  $P=0.010$ ), pre-pregnancy BMI $\geq$ 18.5 (B=-0.009,  $P=0.010$ ) and  
7  
8 249 pre-pregnancy BMI $\geq$ 18.5 to GWG not below IOM recommendations (B=-0.003,  
9  
10  
11 250  $P=0.007$ ).

12  
13 251 In our model, the indirect effect came from the coefficient “a” multiplying by  
14  
15 252 coefficient “b”. For example, woman with high SES had more chance of taking a  
16  
17  
18 253 multi-vitamin supplement (B=0.317,  $P<0.001$ ). Then, a multi-vitamin supplement  
19  
20  
21 254 taking decreased the SGA (B=-0.066,  $P<0.05$ ). Thus, the indirect effect of SES to  
22  
23 255 SGA was  $0.317* -0.066 = -0.021$  through taking a multi-vitamin supplement.  
24  
25  
26  
27  
28  
29  
30  
31  
32  
33  
34  
35  
36  
37  
38  
39  
40  
41  
42  
43  
44  
45  
46  
47  
48  
49  
50  
51  
52  
53  
54  
55  
56  
57  
58  
59  
60

Table 4. Indirect and total effects of socio-economic status and maternal characteristics and lifestyles during pregnancy on SGA.

| Pathway                                                                 | SES→<br>Mediators      | Mediators→<br>Birth outcomes | B      | SE    | 95%CI            | P value | β      |
|-------------------------------------------------------------------------|------------------------|------------------------------|--------|-------|------------------|---------|--------|
|                                                                         | a                      | b                            | a*b    |       |                  |         |        |
| Small-for-gestational age (SGA)                                         |                        |                              |        |       |                  |         |        |
| Total effect                                                            |                        |                              | -0.067 |       |                  |         | -0.030 |
| Direct effect (c)                                                       |                        |                              | -0.046 | 0.044 | (-0.132, 0.040)  | 0.299   | -0.034 |
| Indirect effect                                                         |                        |                              | -0.067 | 0.021 | (-0.108, -0.026) | 0.001   | -0.030 |
| SES→ Pre-pregnancy BMI≥18.50→GWG not below IOM recommendations          | 0.033*, -0.253**       | 0.321**                      | -0.003 | 0.001 | (-0.005, -0.001) | 0.007   | -0.001 |
| SES→ GWG not below IOM recommendations                                  | -0.045                 | 0.321**                      | -0.014 | 0.013 | (-0.039, 0.011)  | 0.273   | -0.006 |
| SES→ Pre-pregnancy BMI≥18.50                                            | 0.033*                 | -0.274**                     | -0.009 | 0.003 | (-0.015, -0.003) | 0.010   | -0.004 |
| SES→ a multi-vitamin supplement during the first trimester of pregnancy | 0.317**                | -0.066*                      | -0.021 | 0.008 | (-0.037, -0.005) | 0.010   | -0.009 |
| SES→ Physical activity during the last trimester of pregnancy           | 0.284**                | 0.017                        | 0.005  | 0.003 | (-0.001, 0.011)  | 0.063   | 0.002  |
| SES→ Sleep quality in the month before the birth                        | 0.150**                | 0.027                        | 0.004  | 0.004 | (-0.004, 0.012)  | 0.297   | 0.002  |
| SES→ PIH                                                                | -0.176*                | 0.166**                      | -0.029 | 0.013 | (-0.054, -0.004) | 0.021   | -0.013 |
| Goodness-of-fit                                                         | RMSEA=0.012, CFI=0.967 |                              |        |       |                  |         |        |

B, unstandardized coefficient; CI, confidence interval; B, standardized coefficient, \* $P < 0.05$ , \*\* $P < 0.001$ . RMSEA, the root mean square error of approximation; CFI, the comparative fit index; SES, socio-economic status; GWG, gestational weight gain; IOM, Institute of Medicine. Covariates of maternal age, passive smoking during pregnancy were adjusted for SGA.

1  
2  
3  
4  
5 256 **DISCUSSION**  
6  
7

8 257 The findings of our study indicated that high SES was related to a reduced risk of  
9  
10 258 SGA after adjustment for potential confounders. In the pathway analysis, PIH, taking  
11  
12 259 a multi-vitamin supplement during early pregnancy, keeping normal pre-pregnancy  
13  
14 260 BMI and gaining reasonable gestational weight were all the significant mediators  
15  
16 261 which completely mediated the relationship between SES and SGA. There were four  
17  
18 262 pathways between SES and SGA as following. ① High SES of pregnancy women  
19  
20 263 predicted lower risk of PIH. The risk of SGA was reduced by no-PIH. ② Women  
21  
22 264 from high SES had more chance to take a multi-vitamin supplement during early  
23  
24 265 pregnancy. A multi-vitamin supplement could lead to a lower risk of SGA infants. ③  
25  
26 266 Women from high SES were more likely to be pre-pregnancy BMI  $\geq 18.50\text{kg/cm}^2$ .  
27  
28 267 Furthermore, pre-pregnancy BMI  $\geq 18.50\text{kg/cm}^2$  decreased the risk of SGA infants  
29  
30 268 afterwards. ④ Women from high SES predicted pre-pregnancy BMI  $\geq 18.50\text{kg/cm}^2$ .  
31  
32 269 Pregnancy women with pre-pregnancy BMI  $\geq 18.50\text{kg/cm}^2$  could gain adequate  
33  
34 270 gestational weight which was not below IOM recommendations. And the GWG not  
35  
36 271 below IOM recommendations decreased the risk of SGA infants.  
37

38 272 One of the strengths of our study was the large sample size. In addition,  
39  
40 273 face-to-face interviews, medical records and measurements provided rich covariate  
41  
42 274 data, which allowed us to adjust for potential confounders for SGA. Thirdly, SES  
43  
44 275 index was combined with parental education and occupation. This index was more  
45  
46 276 representative and reasonable to represent SES compared with using only education or  
47  
48  
49  
50  
51  
52  
53  
54  
55  
56

1  
2  
3  
4 277 occupation in China. We acknowledge that there were also some limitations. Firstly,  
5  
6 278 information on education and occupation was obtained using face-to-face  
7  
8 279 questionnaires, which might have bias. Occupation can fluctuate over time, and it is  
9  
10 280 more likely to lead to misclassification. Secondly, although we carefully adjusted for  
11  
12  
13 281 several potential confounders for SGA, we were unlikely to fully rule out the  
14  
15 282 possibility of residual confounding by other unmeasured factors such as parents'  
16  
17 283 history of SGA, maternal stress during pregnancy. Thirdly, some of our variables  
18  
19 284 including a micronutrient supplement, physical activity and sleep quality during  
20  
21 285 pregnancy relied on self-reporting, which were subjective.  
22  
23  
24

25 286 Predictably, high SES was a protector of SGA in our study. A large  
26  
27 287 population-based study from Finland reported that SES determined by women's  
28  
29 288 occupation was inversely associated with the risk of SGA.<sup>12</sup> A birth cohort study  
30  
31 289 conducted in France reported that low SES determined by neighbourhood deprivation  
32  
33 290 may affect foetal growth, especially in rural areas.<sup>26</sup> These two studies were consistent  
34  
35 291 with our results. However, Clayborne et al. did not find a direct association between  
36  
37 292 SES measured by neighborhood deprivation and the risk of SGA in Canada.<sup>27</sup> Because  
38  
39 293 of the different measures of SES, these studies may not be easily compared. The  
40  
41 294 underlying mechanisms responsible for increased risk of SGA among primiparae with  
42  
43 295 low SES remain speculative. In our study, we found that some mediators could  
44  
45 296 completely mediate SES and SGA.  
46  
47  
48  
49

50  
51  
52 297 In the pathway analysis, we observed that PIH was a mediator between SES and  
53  
54 298 SGA. We demonstrated that SES was associated with PIH among primiparae. A  
55  
56

1  
2  
3  
4 299 meta-analysis including 51 studies found that low SES was associated with higher  
5  
6 300 blood pressure. This association was particularly evident in the level of education.<sup>28</sup>  
7  
8 301 Adherence to knowledge of hypertension and more social resources to maintain  
9  
10 302 healthy behaviours could explain why SES likely affects PIH among pregnant women.  
11  
12  
13 303 The rate of SGA infants from the PIH group was significantly higher compared with  
14  
15 304 the no PIH group in our study. PIH is associated with a reduction in placental  
16  
17 305 perfusion, which influences the size of the placenta.<sup>29</sup> In SGA infants, the size of the  
18  
19 306 placental disc was smaller and the birthweight was lighter.<sup>30</sup> Placenta is an important  
20  
21 307 organ for foetus and supplies all the nutrients needed for foetal development. The  
22  
23 308 pathology of placental was potentially causing or contributing to SGA and  
24  
25 309 hypertension was one of the factors in aetiology.<sup>31</sup> The growth and development of the  
26  
27 310 placenta being influenced by PIH may be suggested an explanation for lower  
28  
29 311 birthweight.<sup>30</sup>

30  
31  
32  
33  
34  
35 312 Taking a multi-vitamin supplement during the first trimester of pregnancy was  
36  
37 313 another mediator between SES and SGA. Women with low SES defined by family  
38  
39 314 income had less chance to obtain optimal nutrient supplements in a meta-analysis  
40  
41 315 including 12 randomized controlled trials.<sup>32</sup> A double-blind cluster randomized  
42  
43 316 controlled trial in rural China reported birthweight was 42 g higher in the multiple  
44  
45 317 micronutrients group compared with the folic acid group.<sup>33</sup> Another birth cohort from  
46  
47 318 Denmark reported that regular periconceptional multi-vitamins use was associated  
48  
49 319 with a reduced risk of SGA births.<sup>34</sup> A multi-vitamin supplement during early  
50  
51 320 pregnancy might reduce the risk of alcohol use in relation to SGA.<sup>35</sup> This result  
52  
53  
54  
55  
56  
57  
58  
59  
60



1  
2  
3 321 evidenced that a multi-vitamin supplement during early pregnancy was a protector  
4  
5  
6 322 factor for SGA, which was similar to our study. Multi-vitamins are important for  
7  
8  
9 323 human physical function and they play vital roles in numerous metabolic processes  
10  
11 324 and physiological functions in the human body. A multi-vitamin supplement during  
12  
13 325 pregnancy reduced the risk of pregnancy complications, involving oxidative stress and  
14  
15  
16 326 pre-eclampsia. Pre-eclampsia could decrease blood to the placenta, which causes  
17  
18 327 growth retardation.<sup>36</sup> In China, most people believe that they should obtain vitamins  
19  
20 328 from daily diet, i.e. fresh vegetables and fruits, which is a natural way instead of  
21  
22  
23 329 taking multi-vitamin supplements every day. Pregnant women are recommended to  
24  
25  
26 330 take multi-vitamin supplements, since they are unable to obtain an adequate nutrient  
27  
28 331 status from their diet alone. Most pregnant women take folic acid, because the  
29  
30 332 government provides folic acid free of charge. For the multi-vitamin supplements,  
31  
32  
33 333 pregnant women decide to take them or not depending on their own opinions. The  
34  
35 334 different dietary habits and customs might explain part of why taking multi-vitamin  
36  
37  
38 335 supplements is significant. Our results showed that high SES was significantly related  
39  
40 336 to a daily supplement of multi-vitamin. As our large-scale studied population came  
41  
42  
43 337 from the city of Wuhan, the results of our study could extend to pregnancy women in  
44  
45 338 Hubei province, which included 12 cities. However, extrapolation of our findings to  
46  
47  
48 339 Chinese women should be cautious. Multicenter cohort studies from different cities of  
49  
50 340 China will be needed in further studies.

51  
52 341 Pre-pregnancy underweight and pre-pregnancy underweight to GWG below IOM  
53  
54  
55 342 recommendations were the two pathways between SES and SGA. The chances of  
56  
57  
58  
59  
60

1  
2  
3  
4 343 having a SGA infant was significantly higher among underweight women compared  
5  
6 344 to normal pre-pregnancy BMI in our study, which was consistent with a study in  
7  
8 345 Lebanon. As Lebanon is a developing country in Asia, and its people are similar to  
9  
10 346 Chinese people, we deemed these results could support our findings. Smoking, poor  
11  
12 347 diet, and medical illness like anaemia which are risk factors for SGA among  
13  
14 348 underweight women, occurred more often. Deficiency of maternal plasma volume  
15  
16 349 among underweight women has been suggested as a cause of SGA.<sup>37</sup> In our study,  
17  
18 350 underweight women were more likely to have insufficient weight gain during  
19  
20 351 pregnancy and below normal weight gain significantly increased the odds of SGA. As  
21  
22 352 expected, GWG below IOM recommendations in women with pre-pregnancy  
23  
24 353 underweight was reportedly more likely to affect the birthweight of their neonates.<sup>38</sup>  
25  
26 354 Poor nutrition or unhealthy psychological state among pregnant women with GWG  
27  
28 355 below IOM recommendations may explain causes of SGA.  
29  
30  
31  
32  
33  
34  
35

## 36 **CONCLUSION**

37  
38  
39  
40 357 We demonstrated that SES was inversely associated with SGA after adjustment for  
41  
42 358 potential confounders among primiparae. In this population, we also found that  
43  
44 359 mediators could completely mediate SES and SGA. Monitoring of blood pressure,  
45  
46 360 avoiding pre-pregnancy underweight, keeping sufficient GWG during pregnancy and  
47  
48 361 taking a multi-vitamin supplement during the first trimester of pregnancy are practical  
49  
50 362 and feasible measurements to reduce the risk of SGA. As we all know, SGA is a  
51  
52 363 public health issue and SES disparities are difficult to change over a short time. It had  
53  
54  
55  
56  
57  
58  
59  
60

1  
2  
3  
4 364 great sense to maintain normal blood pressure and keep a healthy lifestyle to reduce  
5  
6 365 cases of SGA infants among primiparae, especially for women of child-bearing age  
7  
8 366 who have a low SES. A future research direction should focus on identifying  
9  
10  
11 367 interventions to successfully reduce socio-economic disparities in SGA.  
12  
13

#### 14 368 **Acknowledgements**

15  
16  
17  
18 369 The authors would like to thank the staff at the Women and Children Medical and  
19  
20 370 Health-care Centre of Wuhan for their support. They also would like to thank all  
21  
22  
23 371 participants in this study for their voluntary participation.  
24  
25  
26

#### 27 372 **REFERENCES**

- 28  
29  
30  
31 373 1. Alexander GR, Himes JH, Kaufman RB, *et al.* A United States national  
32  
33 374 reference for fetal growth. *Obstet Gynecol* 1996;87(2):163-8.  
34  
35 375 2. Qiu X, Lodha A, Shah PS, *et al.* Neonatal outcomes of small for gestational  
36  
37 376 age preterm infants in Canada. *Am J Perinatol* 2012;29(2):87-94.  
38  
39 377 3. Risnes KR, Vatten LJ, Baker JL, *et al.* Birthweight and mortality in adulthood:  
40  
41 378 a systematic review and meta-analysis. *Int J Epidemiol* 2011;40(3):647-61.  
42  
43 379 4. Mwaniki MK, Atieno M, Lawn JE, *et al.* Long-term neurodevelopmental  
44  
45 380 outcomes after intrauterine and neonatal insults: a systematic review. *Lancet*  
46  
47 381 2012;379(9814):445-52.  
48  
49 382 5. Lee AC, Katz J, Blencowe H, *et al.* National and regional estimates of term  
50  
51 383 and preterm babies born small for gestational age in 138 low-income and  
52  
53  
54  
55  
56

- 1  
2  
3 384 middle-income countries in 2010. *Lancet Glob Health* 2013;1(1):e26-36.
- 4  
5  
6 385 6. Meersseman W, Verschueren P, Tousseyn T, *et al.* A global reference for  
7  
8 386 fetal-weight and birthweight percentiles. *Lancet* 2011;377(9780):1855-61.
- 9  
10  
11 387 7. Gaudineau A. Prevalence, risk factors, maternal and fetal morbidity and  
12  
13 388 mortality of intrauterine growth restriction and small-for-gestational age. *J*  
14  
15 389 *Gynecol Obstet Biol Reprod* 2013;42(8):895-910.
- 16  
17  
18 390 8. Huang H, Wan Mohamed Radzi CW, Salarzadeh Jenatabadi H. Family  
19  
20 391 Environment and Childhood Obesity: A New Framework with Structural  
21  
22 392 Equation Modeling. *Int J Environ Res Public Health* 2017;14(2). doi:  
23  
24 393 10.3390/ijerph14020181
- 25  
26  
27 394 9. Fujiwara T, Ito J, Kawachi I. Income inequality, parental socioeconomic status,  
28  
29 395 and birth outcomes in Japan. *Am J Epidemiol* 2013;177(10):1042-52.
- 30  
31  
32 396 10. Herzog B, Lacruz ME, Haerting J, *et al.* Socioeconomic status and  
33  
34 397 anthropometric changes-A meta-analytic approach from seven German cohorts.  
35  
36 398 *Obesity* 2016;24(3):710-8.
- 37  
38  
39 399 11. Patra K, Greene MM, Patel AL, *et al.* Maternal Education Level Predicts  
40  
41 400 Cognitive, Language, and Motor Outcome in Preterm Infants in the Second  
42  
43 401 Year of Life. *Am J Perinatol* 2016;33(8):738-44.
- 44  
45  
46 402 12. Räisänen S, Gissler M, Sankilampi U, *et al.* Contribution of socioeconomic  
47  
48 403 status to the risk of small for gestational age infants – a population-based study  
49  
50 404 of 1,390,165 singleton live births in Finland. *Int J Equity Health*  
51  
52 405 2013;12(1):1-8.  
53  
54  
55  
56  
57  
58  
59  
60

- 1  
2  
3  
4 406 13. Ng SK, Cameron CM, Hills AP, *et al.* Socioeconomic disparities in  
5  
6 407 prepregnancy BMI and impact on maternal and neonatal outcomes and  
7  
8 408 postpartum weight retention: the EFHL longitudinal birth cohort study. *BMC*  
9  
10 409 *Pregnancy Childbirth* 2014;14(1):314. doi: 10.1186/1471-2393-14-314  
11  
12  
13 410 14. Leung JYY, Leung GM, Schooling CM. Socioeconomic disparities in preterm  
14  
15 411 birth and birth weight in a non-Western developed setting: evidence from  
16  
17 412 Hong Kong's 'Children of 1997' birth cohort. *J. Epidemiol. Community Health*  
18  
19 413 2016;70(11):1074-81.  
20  
21  
22  
23 414 15. Wang F, Sociology DO. Socioeconomic Status,Lifestyle and Health Inequality.  
24  
25 415 *Chinese Journal of Sociology* 2012;32(2):125-43.  
26  
27  
28 416 16. Kramer MS, Seguin L, Lydon J, *et al.* Socio-economic disparities in pregnancy  
29  
30 417 outcome: why do the poor fare so poorly? *Paediatr Perinat Epidemiol*  
31  
32 418 2000;14(3):194-210.  
33  
34  
35 419 17. Glinianaia S V, Ghosh R, Rankin J, *et al.* No improvement in socioeconomic  
36  
37 420 inequalities in birthweight and preterm;birth over four decades: a  
38  
39 421 population-based cohort study. *Bmc Public Health* 2013;13(1):345. doi:  
40  
41 422 10.1186/1471-2458-13-345  
42  
43  
44  
45 423 18. Song L, Shen L, Li H, *et al.* Socio-economic status and risk of gestational  
46  
47 424 diabetes mellitus among Chinese women. *Diabet Med* 2017;34(10);1421-7.  
48  
49  
50 425 19. Zhou BF. Predictive Values of Body Mass Index and Waist Circumference for  
51  
52 426 Risk Factors of Certain Related Diseases in Chinese Adults - Study on  
53  
54 427 Optimal Cut-off Points of Body Mass Index and Waist Circumference in

- 1  
2  
3 428 Chinese Adults. *Biomed Environ Sci* 2002;15(1):83-96.
- 4  
5  
6 429 20. Zhou A, Xiong C, Hu R, *et al.* Pre-Pregnancy BMI, Gestational Weight Gain,  
7  
8 430 and the Risk of Hypertensive Disorders of Pregnancy: A Cohort Study in  
9  
10 431 Wuhan, China. *PloS one* 2015;10(8):e0136291. doi:  
12  
13 432 10.1371/journal.pone.0136291
- 14  
15 433 21. Zhao SC, Xia M, Tang JC, *et al.* Associations between metabolic syndrome  
16  
17 434 and clinical benign prostatic hyperplasia in a northern urban Han Chinese  
18  
19 435 population: A prospective cohort study. *Sci Rep* 2016;6:33933. doi:  
20  
21 436 10.1038/srep33933
- 22  
23 437 22. Zhai Y, Sulayiman X, Li WR, *et al.* The relationship between socioeconomic  
24  
25 438 status and overweight and obesity among elementary school children in China.  
26  
27 439 *Zhonghua yu fang yi xue za zhi [Chinese journal of preventive medicine]*  
28  
29 440 2013;47(10):945-8.
- 30  
31 441 23. Gavin AR, Morris J. The Association Between Maternal Early Life Forced  
32  
33 442 Sexual Intercourse and Offspring Birth Weight: The Role of Socioeconomic  
34  
35 443 Status. *J Womens Health* 2017;26(5):442-9.
- 36  
37 444 24. Richiardi L, Bellocco R, Zugna D. Mediation analysis in epidemiology:  
38  
39 445 methods, interpretation and bias. *Int J Epidemiol* 2013;42(5):1511-9.
- 40  
41 446 25. Kantomaa MT, Stamatakis E, Kankaanpaa A, *et al.* Physical activity and  
42  
43 447 obesity mediate the association between childhood motor function and  
44  
45 448 adolescents' academic achievement. *Proc Natl Acad Sci U S A*  
46  
47 449 2013;110(5):1917-22.

- 1  
2  
3  
4 450 26. Bertin M, Viel JF, Monfort C, *et al.* Socioeconomic Disparities in Adverse  
5  
6 451 Birth Outcomes in Urban and Rural Contexts: a French Mother-Child Cohort.  
7  
8 452 *Paediatr Perinat Epidemiol* 2015;29(5):426-35.  
9  
10  
11 453 27. Clayborne ZM, Giesbrecht GF, Bell RC, *et al.* Relations between  
12  
13 454 neighbourhood socioeconomic status and birth outcomes are mediated by  
14  
15 455 maternal weight. *Soc Sci Med* 2017;175:143-51.  
16  
17  
18 456 28. Leng B, Jin Y, Li G, *et al.* Socioeconomic status and hypertension: a  
19  
20 457 meta-analysis. *J Hypertens* 2015;33(2):221-9.  
21  
22  
23 458 29. Chisholm KM, Folkins AK. Placental and Clinical Characteristics of Term  
24  
25 459 Small-for-Gestational-Age Neonates: A Case-Control Study. *Pediatr Dev*  
26  
27 460 *Pathol* 2016;19(1):37-46.  
28  
29  
30 461 30. Phad N, Dahlstrom JE, Ellwood D, *et al.* The effect of pregnancy-induced  
31  
32 462 hypertensive disorders on placental growth along short and long axes and  
33  
34 463 neonatal outcomes. *Aust N Z J Obstet Gynaecol* 2015;55(3):239-44.  
35  
36  
37 464 31. Thorne J, Downey P, Mooney EE. Placental pathology associated with small  
38  
39 465 for gestational age infants. *Ir Med J* 2014;107(8):249-50.  
40  
41  
42 466 32. Carine R, Fisher DJ, Osmond C, *et al.* Multiple micronutrient supplementation  
43  
44 467 during pregnancy in low-income countries: a meta-analysis of effects on  
45  
46 468 stillbirths and early and late neonatal mortality. *Food Nutr Bull* 2009;30(4  
47  
48 469 Suppl):S547-S55.  
49  
50  
51 470 33. Zeng L, Dibley MJ, Cheng Y, *et al.* Impact of micronutrient supplementation  
52  
53 471 during pregnancy on birth weight, duration of gestation, and perinatal  
54  
55  
56  
57  
58  
59  
60

- 1  
2  
3 472 mortality in rural western China: double blind cluster randomised controlled  
4  
5  
6 473 trial. *BMJ* 2008;337:a2001. doi: 10.1136/bmj.a2001  
7  
8 474 34. Catov JM, Bodnar LM, Olsen J, *et al.* Periconceptional multivitamin use and  
9  
10 475 risk of preterm or small-for-gestational-age births in the Danish National Birth  
11  
12  
13 476 Cohort. *Am J Clin Nutr* 2011;94(3):906-12.  
14  
15 477 35. Avalos LA, Kaskutas L, Block G, *et al.* Does lack of multinutrient  
16  
17 478 supplementation during early pregnancy increase vulnerability to  
18  
19 479 alcohol-related preterm or small-for-gestational-age births? *Matern Child*  
20  
21 480 *Health J* 2011;15(8):1324-32.  
22  
23 481 36. Roberts JM, Cooper DW. Pathogenesis and genetics of pre-eclampsia. *Lancet*  
24  
25 482 2001;357(9249):53-6.  
26  
27 483 37. Buschur E, Kim C. Guidelines and interventions for obesity during pregnancy.  
28  
29 484 *Int J Gynaecol Obstet* 2012;119(1):6-10.  
30  
31 485 38. Savitz DA, Stein CR, Siega-Riz AM, *et al.* Gestational Weight Gain and Birth  
32  
33 486 Outcome in Relation to Prepregnancy Body Mass Index and Ethnicity. *Ann*  
34  
35 487 *Epidemiol* 2011;21(2):78-85.  
36  
37  
38  
39  
40  
41  
42  
43  
44

45 489 **Contributors** X.L. contributed to acquisition of data, statistical analysis,  
46  
47 490 interpretation of data and manuscript writing. F.L.L., H.T.G., F.H., X.Y.X., X.L., H.M.,  
48  
49 491 S.Q.X., interpretation of the data. J.J.Z., R.R.S. supervised the project and wrote the  
50  
51 492 manuscript. All authors approved the final version to be published. R.R.S. is the  
52  
53 493 guarantor of this work.  
54  
55  
56  
57  
58  
59  
60



1  
2  
3  
4 494 **Competing interests** None declared.

5  
6 495 **Patient consent** Obtained.

7  
8 496 **Funding** This work was supported by National Natural Science Foundation of China  
9  
10 497 (81673194, 21437002 and 81372959). Project from Health and Family Planning  
11  
12 498 Commission of Hubei Province (WJ2015MB019).

13  
14  
15 499 **Data sharing statement** No additional data is available.

16  
17  
18  
19  
20 500 **Figure legends**

21  
22  
23 501 Figure 1. Serial mediation models of the indirect associations socioeconomic status  
24  
25 502 (SES) and small-for-gestational age (SGA). Unstandardized regression coefficients  
26  
27 503 are a1, a1', a2, a3, a4, a5, a6, b1, b2, b3, b4, b5, b6, c. Adjusted for maternal age and  
28  
29 504 passive smoking during pregnancy.  
30  
31  
32  
33  
34  
35  
36  
37  
38  
39  
40  
41  
42  
43  
44  
45  
46  
47  
48  
49  
50  
51  
52  
53  
54  
55  
56  
57  
58  
59  
60

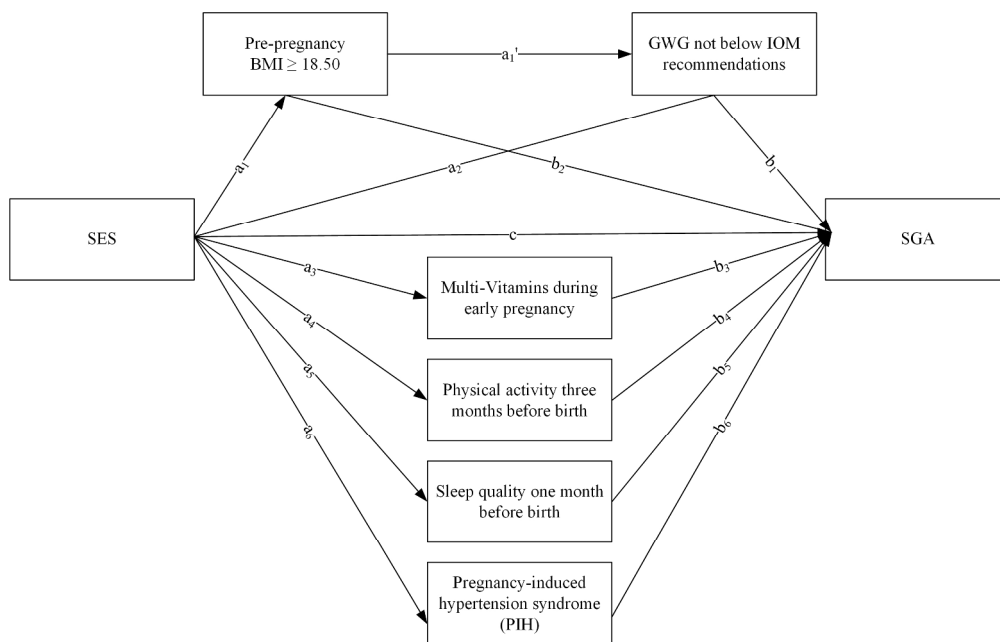

Figure 1. Serial mediation models of the indirect associations socioeconomic status (SES) and small-for-gestational age (SGA). Unstandardized regression coefficients are  $a_1$ ,  $a_1'$ ,  $a_2$ ,  $a_3$ ,  $a_4$ ,  $a_5$ ,  $a_6$ ,  $b_1$ ,  $b_2$ ,  $b_3$ ,  $b_4$ ,  $b_5$ ,  $b_6$ ,  $c$ . Adjusted for maternal age and passive smoking during pregnancy.

245x155mm (300 x 300 DPI)

ew only

Supplementary Table 1. Scores for coding education by number of years of school completed

| Category          | Total years | Scores |         |
|-------------------|-------------|--------|---------|
|                   |             | Males  | Females |
| Doctor            | 22          | 69     | 73      |
| Master            | 19          | 69     | 73      |
| college           | 16          | 63     | 66      |
| Junior school     | 15          | 61     | 63      |
| high school       | 12          | 52     | 53      |
| middle school     | 9           | 45     | 44      |
| Elementary school | 6           | 36     | 34      |
|                   | 3           | 33     | 32      |
|                   | 0           | 29     | 28      |

Supplementary Table 2. Average scores for categories of major occupational groups

| Major occupational groups | Category | Scores |
|---------------------------|----------|--------|
| Managerial workers        | I        | 59     |
| professionals & technical | II       | 63     |
| Office clerks             | III      | 56     |
| Service workers           | IV       | 46     |
| Agriculture and forestry  | V        | 34     |
| Laborer                   | VI       | 42     |
| Soldier                   | VII      | 53     |
| Others                    | VIII     | 49     |

Supplementary table 3. Correlation matrix of the study variables among primiparas in Wuhan, China (N=8737)

| Variables                                                          | 1        | 2        | 3       | 4        | 5        | 6      | 7        | 8        | 9       | 10       | 11 |
|--------------------------------------------------------------------|----------|----------|---------|----------|----------|--------|----------|----------|---------|----------|----|
| GWG by IOM recommendations                                         | —        |          |         |          |          |        |          |          |         |          |    |
| Pre-pregnancy BMI                                                  | -0.065** | —        |         |          |          |        |          |          |         |          |    |
| Physical activity during the last trimester of pregnancy           | -0.001   | 0.002    |         |          |          |        |          |          |         |          |    |
| Sleep quality in the month before the birth                        | -0.001   | 0.017    | -0.002  | —        |          |        |          |          |         |          |    |
| A multi-vitamin supplement during the first trimester of pregnancy | -0.008   | 0.019    | 0.110** | -0.031** | —        |        |          |          |         |          |    |
| Infant's gender                                                    | -0.002   | -0.012   | -0.003  | 0.005    | -0.008   | —      |          |          |         |          |    |
| Passive smoking during pregnancy                                   | -0.008   | -0.031** | -0.009  | 0.017    | 0.046**  | 0.004  | —        |          |         |          |    |
| Maternal age                                                       | -0.024*  | 0.133**  | -0.021* | -0.017   | 0.156**  | -0.015 | -0.020   | —        |         |          |    |
| PIH                                                                | -0.021*  | 0.058**  | -0.001* | -0.016   | -0.016   | 0.002  | -0.007   | 0.037**  | —       |          |    |
| SES                                                                | -0.020   | 0.069**  | 0.047** | 0.047**  | 0.147**  | -0.010 | -0.060** | 0.252**  | -0.023* | —        |    |
| SGA                                                                | 0.137**  | -0.077** | 0.016   | 0.012    | -0.036** | 0.008  | 0.007    | -0.040** | 0.035** | -0.039** | —  |

SES, socio-economic status; BMI, body mass index; GWG, gestational weight gain; IOM, Institute of Medicine; SGA, small-for-gestational age; AGA, appropriate-for-gestational age; PIH, pregnancy-induced hypertension syndrome. \* $P < 0.05$ , \*\* $P < 0.001$

**STROBE 2007 (v4) checklist of items to be included in reports of observational studies in epidemiology\***  
**Checklist for cohort, case-control, and cross-sectional studies (combined)**

| Section/Topic             | Item # | Recommendation                                                                                                                                                                                                                                                                                                                                                                                                                                                         | Reported on page # |
|---------------------------|--------|------------------------------------------------------------------------------------------------------------------------------------------------------------------------------------------------------------------------------------------------------------------------------------------------------------------------------------------------------------------------------------------------------------------------------------------------------------------------|--------------------|
| Title and abstract        | 1      | (a) Indicate the study’s design with a commonly used term in the title or the abstract                                                                                                                                                                                                                                                                                                                                                                                 | 1-2                |
|                           |        | (b) Provide in the abstract an informative and balanced summary of what was done and what was found                                                                                                                                                                                                                                                                                                                                                                    | 1-2                |
| <b>Introduction</b>       |        |                                                                                                                                                                                                                                                                                                                                                                                                                                                                        |                    |
| Background/rationale      | 2      | Explain the scientific background and rationale for the investigation being reported                                                                                                                                                                                                                                                                                                                                                                                   | 4-6                |
| Objectives                | 3      | State specific objectives, including any pre-specified hypotheses                                                                                                                                                                                                                                                                                                                                                                                                      | 5-6                |
| <b>Methods</b>            |        |                                                                                                                                                                                                                                                                                                                                                                                                                                                                        |                    |
| Study design              | 4      | Present key elements of study design early in the paper                                                                                                                                                                                                                                                                                                                                                                                                                | 6                  |
| Setting                   | 5      | Describe the setting, locations, and relevant dates, including periods of recruitment, exposure, follow-up, and data collection                                                                                                                                                                                                                                                                                                                                        | 6-8                |
| Participants              | 6      | (a) <i>Cohort study</i> —Give the eligibility criteria, and the sources and methods of selection of participants. Describe methods of follow-up<br><i>Case-control study</i> —Give the eligibility criteria, and the sources and methods of case ascertainment and control selection. Give the rationale for the choice of cases and controls<br><i>Cross-sectional study</i> —Give the eligibility criteria, and the sources and methods of selection of participants | 6                  |
|                           |        | (b) <i>Cohort study</i> —For matched studies, give matching criteria and number of exposed and unexposed<br><i>Case-control study</i> —For matched studies, give matching criteria and the number of controls per case                                                                                                                                                                                                                                                 |                    |
| Variables                 | 7      | Clearly define all outcomes, exposures, predictors, potential confounders, and effect modifiers. Give diagnostic criteria, if applicable                                                                                                                                                                                                                                                                                                                               | 7-9                |
| Data sources/ measurement | 8*     | For each variable of interest, give sources of data and details of methods of assessment (measurement). Describe comparability of assessment methods if there is more than one group                                                                                                                                                                                                                                                                                   | 11-13              |
| Bias                      | 9      | Describe any efforts to address potential sources of bias                                                                                                                                                                                                                                                                                                                                                                                                              |                    |
| Study size                | 10     | Explain how the study size was arrived at                                                                                                                                                                                                                                                                                                                                                                                                                              | 6                  |
| Quantitative variables    | 11     | Explain how quantitative variables were handled in the analyses. If applicable, describe which groupings were chosen and why                                                                                                                                                                                                                                                                                                                                           |                    |
| Statistical methods       | 12     | (a) Describe all statistical methods, including those used to control for confounding                                                                                                                                                                                                                                                                                                                                                                                  | 9-10               |
|                           |        | (b) Describe any methods used to examine subgroups and interactions                                                                                                                                                                                                                                                                                                                                                                                                    |                    |
|                           |        | (c) Explain how missing data were addressed                                                                                                                                                                                                                                                                                                                                                                                                                            |                    |
|                           |        | (d) <i>Cohort study</i> —If applicable, explain how loss to follow-up was addressed<br><i>Case-control study</i> —If applicable, explain how matching of cases and controls was addressed                                                                                                                                                                                                                                                                              |                    |

|                          |     |                                                                                                                                                                                                              |       |
|--------------------------|-----|--------------------------------------------------------------------------------------------------------------------------------------------------------------------------------------------------------------|-------|
|                          |     | <i>Cross-sectional study</i> —If applicable, describe analytical methods taking account of sampling strategy                                                                                                 |       |
|                          |     | (e) Describe any sensitivity analyses                                                                                                                                                                        |       |
| <b>Results</b>           |     |                                                                                                                                                                                                              |       |
| Participants             | 13* | (a) Report numbers of individuals at each stage of study—eg numbers potentially eligible, examined for eligibility, confirmed eligible, included in the study, completing follow-up, and analysed            | 6     |
|                          |     | (b) Give reasons for non-participation at each stage                                                                                                                                                         | 6     |
|                          |     | (c) Consider use of a flow diagram                                                                                                                                                                           |       |
| Descriptive data         | 14* | (a) Give characteristics of study participants (eg demographic, clinical, social) and information on exposures and potential confounders                                                                     | 11-12 |
|                          |     | (b) Indicate number of participants with missing data for each variable of interest                                                                                                                          |       |
|                          |     | (c) <i>Cohort study</i> —Summarise follow-up time (eg, average and total amount)                                                                                                                             |       |
| Outcome data             | 15* | <i>Cohort study</i> —Report numbers of outcome events or summary measures over time                                                                                                                          |       |
|                          |     | <i>Case-control study</i> —Report numbers in each exposure category, or summary measures of exposure                                                                                                         |       |
|                          |     | <i>Cross-sectional study</i> —Report numbers of outcome events or summary measures                                                                                                                           | 11    |
| Main results             | 16  | (a) Give unadjusted estimates and, if applicable, confounder-adjusted estimates and their precision (eg, 95% confidence interval). Make clear which confounders were adjusted for and why they were included | 13-15 |
|                          |     | (b) Report category boundaries when continuous variables were categorized                                                                                                                                    |       |
|                          |     | (c) If relevant, consider translating estimates of relative risk into absolute risk for a meaningful time period                                                                                             |       |
| Other analyses           | 17  | Report other analyses done—eg analyses of subgroups and interactions, and sensitivity analyses                                                                                                               | 14-16 |
| <b>Discussion</b>        |     |                                                                                                                                                                                                              |       |
| Key results              | 18  | Summarise key results with reference to study objectives                                                                                                                                                     | 17    |
| Limitations              | 19  | Discuss limitations of the study, taking into account sources of potential bias or imprecision. Discuss both direction and magnitude of any potential bias                                                   | 17-18 |
| Interpretation           | 20  | Give a cautious overall interpretation of results considering objectives, limitations, multiplicity of analyses, results from similar studies, and other relevant evidence                                   | 18-20 |
| Generalisability         | 21  | Discuss the generalisability (external validity) of the study results                                                                                                                                        | 20-21 |
| <b>Other information</b> |     |                                                                                                                                                                                                              |       |
| Funding                  | 22  | Give the source of funding and the role of the funders for the present study and, if applicable, for the original study on which the present article is based                                                | 27    |

\*Give information separately for cases and controls in case-control studies and, if applicable, for exposed and unexposed groups in cohort and cross-sectional studies.

**Note:** An Explanation and Elaboration article discusses each checklist item and gives methodological background and published examples of transparent reporting. The STROBE checklist is best used in conjunction with this article (freely available on the Web sites of PLoS Medicine at <http://www.plosmedicine.org/>, Annals of Internal Medicine at <http://www.annals.org/>, and Epidemiology at <http://www.epidem.com/>). Information on the STROBE Initiative is available at [www.strobe-statement.org](http://www.strobe-statement.org).
