# Supplementary material for: Pathways linking socioeconomic status to small-for-gestational-age (SGA) infants among primiparae: a birth cohort study in China
Source: PubMed Central journal article supplement — BMJ Open. 2018 Jun 14;8(6):e020694. doi: 10.1136/bmjopen-2017-020694 (PMC6009518; doi:10.1136/bmjopen-2017-020694), 2018-06-14
Supplement: bmjopen-2017-020694supp001.pdf [file bmjopen-2017-020694supp001.pdf]

Supplementary Table 1. Scores for coding education by number of years of school completed

| Category          | Total years | Scores |         |
|-------------------|-------------|--------|---------|
|                   |             | Males  | Females |
| Doctor            | 22          | 69     | 73      |
| Master            | 19          | 69     | 73      |
| college           | 16          | 63     | 66      |
| Junior school     | 15          | 61     | 63      |
| high school       | 12          | 52     | 53      |
| middle school     | 9           | 45     | 44      |
| Elementary school | 6           | 36     | 34      |
|                   | 3           | 33     | 32      |
|                   | 0           | 29     | 28      |

Supplementary Table 2. Average scores for categories of major occupational groups

| Major occupational groups | Category | Scores |
|---------------------------|----------|--------|
| Managerial workers        | I        | 59     |
| professionals & technical | II       | 63     |
| Office clerks             | III      | 56     |
| Service workers           | IV       | 46     |
| Agriculture and forestry  | V        | 34     |
| Laborer                   | VI       | 42     |
| Soldier                   | VII      | 53     |
| Others                    | VIII     | 49     |

Supplementary table 3. Correlation matrix of the study variables among primiparas in Wuhan, China (N=8737)

| Variables                                                          | 1        | 2        | 3       | 4        | 5        | 6      | 7        | 8        | 9       | 10       | 11 |
|--------------------------------------------------------------------|----------|----------|---------|----------|----------|--------|----------|----------|---------|----------|----|
| GWG by IOM recommendations                                         | —        |          |         |          |          |        |          |          |         |          |    |
| Pre-pregnancy BMI                                                  | -0.065** | —        |         |          |          |        |          |          |         |          |    |
| Physical activity during the last trimester of pregnancy           | -0.001   | 0.002    |         |          |          |        |          |          |         |          |    |
| Sleep quality in the month before the birth                        | -0.001   | 0.017    | -0.002  | —        |          |        |          |          |         |          |    |
| A multi-vitamin supplement during the first trimester of pregnancy | -0.008   | 0.019    | 0.110** | -0.031** | —        |        |          |          |         |          |    |
| Infant's gender                                                    | -0.002   | -0.012   | -0.003  | 0.005    | -0.008   | —      |          |          |         |          |    |
| Passive smoking during pregnancy                                   | -0.008   | -0.031** | -0.009  | 0.017    | 0.046**  | 0.004  | —        |          |         |          |    |
| Maternal age                                                       | -0.024*  | 0.133**  | -0.021* | -0.017   | 0.156**  | -0.015 | -0.020   | —        |         |          |    |
| PIH                                                                | -0.021*  | 0.058**  | -0.001* | -0.016   | -0.016   | 0.002  | -0.007   | 0.037**  | —       |          |    |
| SES                                                                | -0.020   | 0.069**  | 0.047** | 0.047**  | 0.147**  | -0.010 | -0.060** | 0.252**  | -0.023* | —        |    |
| SGA                                                                | 0.137**  | -0.077** | 0.016   | 0.012    | -0.036** | 0.008  | 0.007    | -0.040** | 0.035** | -0.039** | —  |

SES, socio-economic status; BMI, body mass index; GWG, gestational weight gain; IOM, Institute of Medicine; SGA, small-for-gestational age; AGA, appropriate-for-gestational age; PIH, pregnancy-induced hypertension syndrome. \* $P < 0.05$ , \*\* $P < 0.001$
